# Supplementary material for: Acid catalysis through N-protonation in undistorted carboxamides: improvement of amide proton sponge acylating ability
Source: Royal Society of Chemistry journal article supplement (doi:10.1039/d2nj02975h), 2022-01-01
Supplement: d2nj02975h1.pdf [file d2nj02975h1.pdf]

# Supporting Information

## **Acid catalysis through N-protonation in undistorted carboxamides: improvement of amide proton sponge acylating ability**

Vladimir Y. Mikshiev\*, Peter M. Tolstoy, Elena Yu. Tupikina, Aleksandra M. Puzyk and  
Mikhail A. Vovk

Institute of Chemistry, St. Petersburg State University, Universitetskij pr. 26, 198504 St. Petersburg,  
Russian Federation

E-mail: vladimirmikshiev@mail.ru

## Table of Contents

|                                                                          |    |
|--------------------------------------------------------------------------|----|
| Correlations and change of the geometric and electronic parameters ..... | 3  |
| Geometric and electronic parameters .....                                | 5  |
| Energy profiles for reactions .....                                      | 17 |

**Table S1.** Geometric and electronic parameters of **10(E)**, cation **10H<sup>+</sup>(E)** and cation **10H<sup>+</sup>(E)'** with frozen distance  $r_3$ .

| Compd                      | $E_{HB}$ , kcal·mol <sup>-1</sup> | $r_1$ , Å | $r_2$ , Å | $r_3$ , Å | $\alpha$ , deg | $\omega$ , deg | $\chi_N$ , deg | $\tau$ , deg | $\vartheta$ , deg | $q_{NPA}$ , e | $q_{MK}$ , e | $q_H$ , e | $\delta$ , ppm |
|----------------------------|-----------------------------------|-----------|-----------|-----------|----------------|----------------|----------------|--------------|-------------------|---------------|--------------|-----------|----------------|
| <b>10(E)</b>               | -                                 | 2.789     | 1.372     | -         | -              | 14.81          | 10.60          | 4.32         | 14.92             | 0.6994        | 0.6232       | 0.1658    | 170.43         |
| <b>10H<sup>+</sup>(E)</b>  | 9.15                              | 2.697     | 1.423     | 1.708     | 154.66         | 0.55           | 35.65          | 2.09         | 37.74             | 0.7122        | 0.4885       | 0.1836    | 176.31         |
| <b>10H<sup>+</sup>(E)'</b> | 10.70                             | 2.664     | 1.427     | 1.658     | 156.25         | 0.68           | 36.98          | 2.46         | 39.43             | 0.7146        | 0.4830       | 0.1855    | 176.74         |
| <b>10H<sup>+</sup>(E)'</b> | 12.49                             | 2.632     | 1.430     | 1.608     | 157.72         | 0.83           | 38.25          | 2.80         | 41.05             | 0.7170        | 0.4833       | 0.1875    | 177.16         |
| <b>10H<sup>+</sup>(E)'</b> | 14.58                             | 2.601     | 1.434     | 1.558     | 159.09         | 0.94           | 39.51          | 3.15         | 42.66             | 0.7196        | 0.4892       | 0.1897    | 177.53         |
| <b>10H<sup>+</sup>(E)'</b> | 17.03                             | 2.572     | 1.439     | 1.508     | 160.31         | 1.14           | 40.69          | 3.54         | 44.23             | 0.7224        | 0.4876       | 0.1922    | 177.90         |
| <b>10H<sup>+</sup>(E)'</b> | 19.94                             | 2.547     | 1.444     | 1.458     | 161.36         | 1.41           | 41.84          | 3.94         | 45.78             | 0.7253        | 0.4799       | 0.1950    | 178.22         |
| <b>10H<sup>+</sup>(E)'</b> | 23.46                             | 2.525     | 1.450     | 1.408     | 162.19         | 1.63           | 42.98          | 4.46         | 47.44             | 0.7286        | 0.4784       | 0.1981    | 178.47         |
| <b>10H<sup>+</sup>(E)'</b> | 27.78                             | 2.510     | 1.458     | 1.358     | 162.77         | 1.88           | 44.05          | 5.17         | 49.22             | 0.7321        | 0.4880       | 0.2017    | 178.62         |
| <b>10H<sup>+</sup>(E)'</b> | 33.17                             | 2.502     | 1.466     | 1.308     | 162.99         | 2.19           | 45.05          | 6.12         | 51.17             | 0.7361        | 0.4931       | 0.2059    | 178.65         |

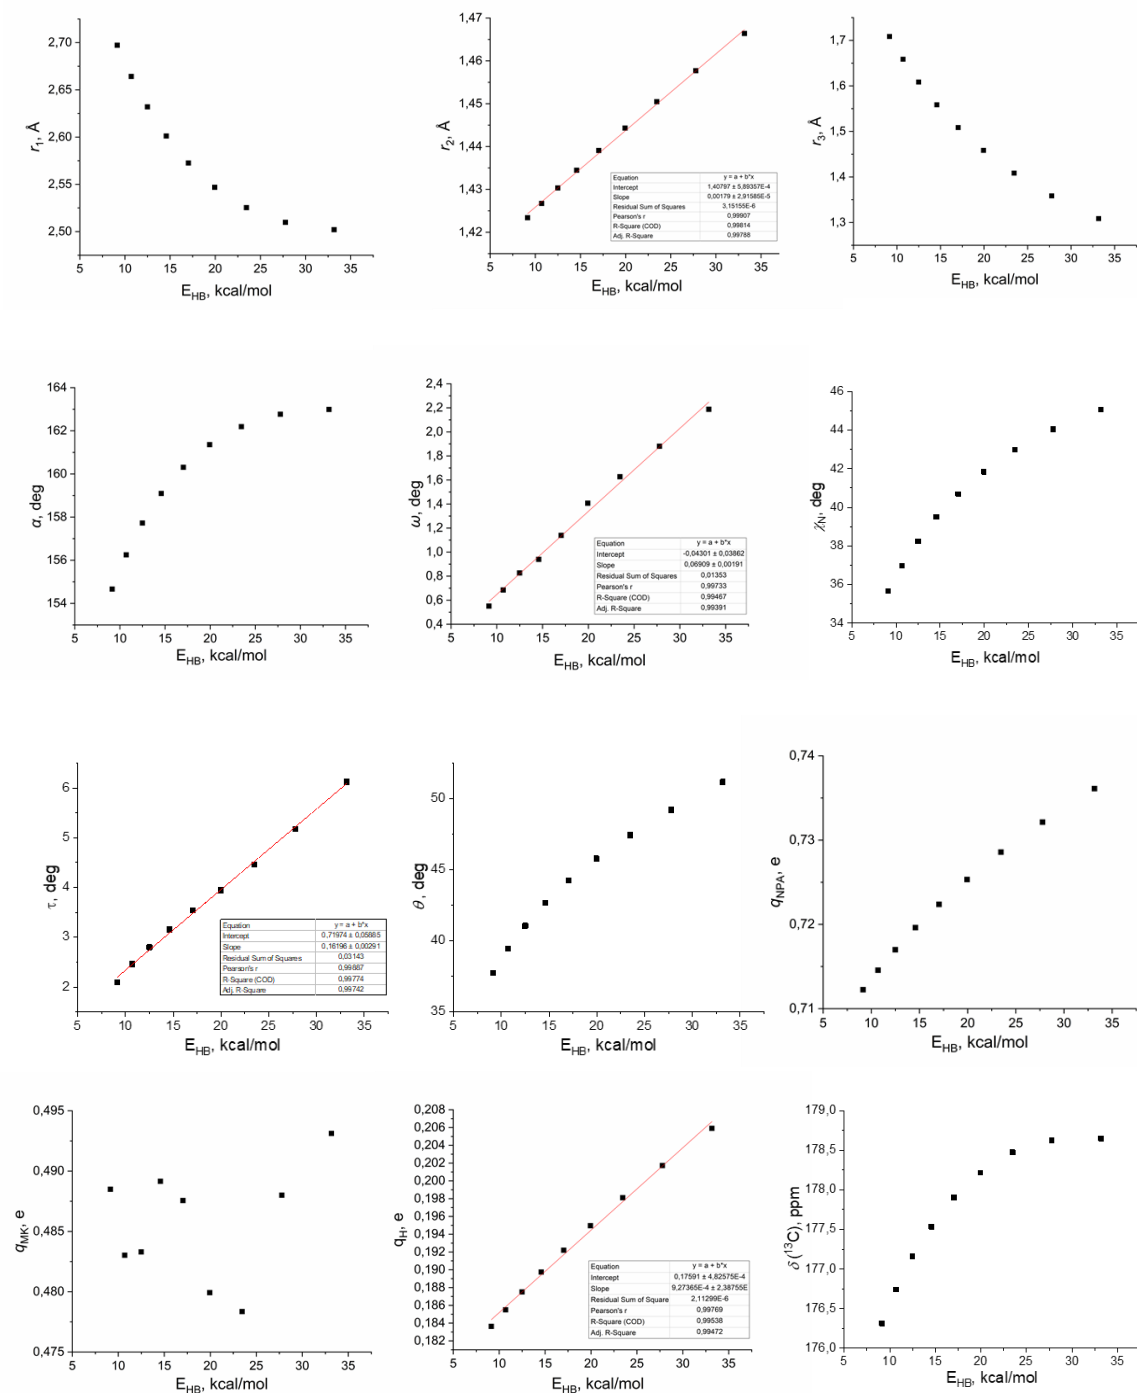

**Figure S1.** Correlations between parameters of activation and hydrogen bond energy for **10H<sup>+</sup>(E)** with frozen distance  $r_3$ .

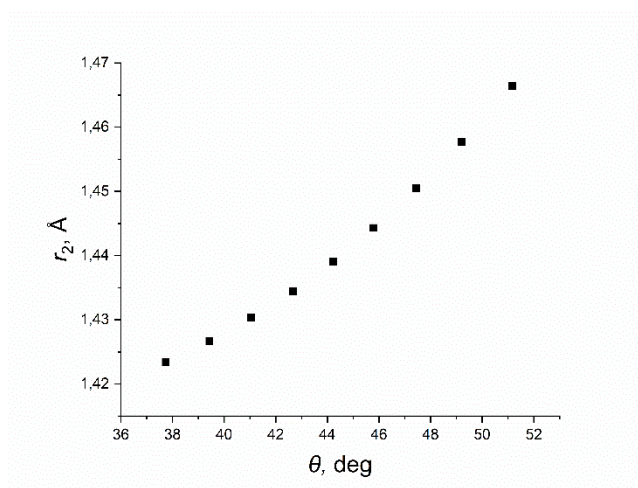

Figure S2. Correlations between  $\vartheta$  and  $r_2$  for  $10\text{H}^+(\text{E})$  with frozen distance  $r_3$ .

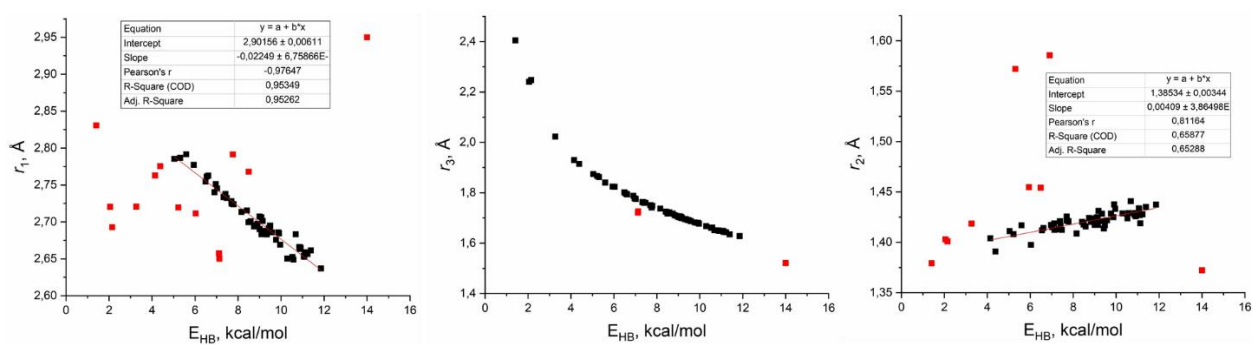

Figure S3. Correlations between parameters of activation and hydrogen bond energy for cations  $9\text{H}^+ - 44\text{H}^+$

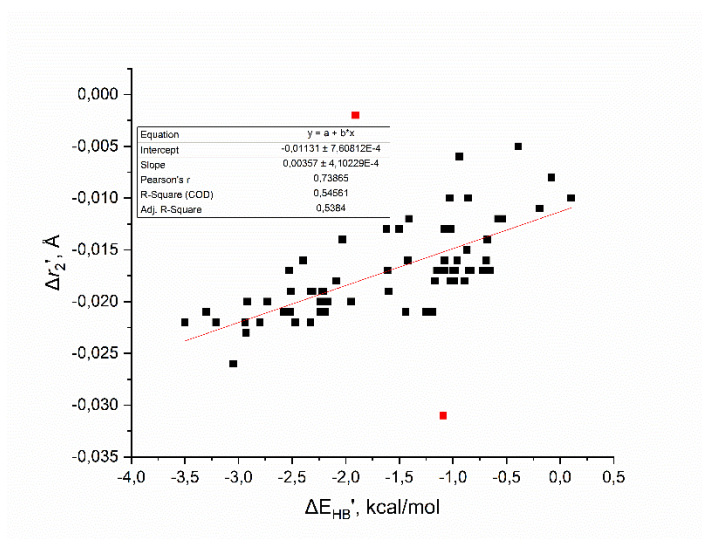

Figure S4. Correlations between parameters  $\Delta r_2'$  and  $\Delta E_{\text{HB}}'$ .

**Table S2.** Geometric and electronic parameters of amide cations 9H<sup>+</sup>-44H<sup>+</sup> in vacuum.

| Compd                | E <sub>HB</sub> ,<br>kcal·mol <sup>-1</sup> | r <sub>1</sub> , Å | r <sub>2</sub> , Å | r <sub>3</sub> , Å | α, deg | ω, deg | χ <sub>N</sub> , deg | τ, deg | ϑ, deg | q <sub>NPA</sub> | q <sub>MK</sub> | q <sub>H</sub> | δ, ppm |
|----------------------|---------------------------------------------|--------------------|--------------------|--------------------|--------|--------|----------------------|--------|--------|------------------|-----------------|----------------|--------|
| 9H <sup>+</sup> (E)  | 9.39*                                       | 2.687              | 1.431              | 1.698              | 153.88 | 5.32   | 42.29                | 12.8   | 55.09  | 0.6931           | 0.3794          | 0.1776         | 178.91 |
| 9H <sup>+</sup> (Z)  | 7.01                                        | 2.763              | 1.414              | 1.794              | 153.42 | 5.92   | 25.54                | 19.09  | 44.63  | 0.6981           | 0.6123          | 0.1773         | 185.38 |
| 10H <sup>+</sup> (E) | 9.15                                        | 2.697              | 1.423              | 1.708              | 156.67 | 0.55   | 35.66                | 2.08   | 37.74  | 0.7123           | 0.4885          | 0.1836         | 180.79 |
| 10H <sup>+</sup> (Z) | 7.33                                        | 2.751              | 1.417              | 1.777              | 153.81 | 4.46   | 35.13                | 9.6    | 44.73  | 0.7175           | 0.6508          | 0.1862         | 187.24 |
| 11H <sup>+</sup> (E) | 11.06                                       | 2.665              | 1.426              | 1.649              | 159.52 | 5.04   | 36.24                | 2.17   | 38.41  | 0.715            | 0.5039          | 0.1854         | 181.44 |
| 11H <sup>+</sup> (Z) | 9.26                                        | 2.707              | 1.42               | 1.704              | 158.84 | 8.99   | 36.21                | 8.53   | 44.74  | 0.7196           | 0.6432          | 0.1874         | 187.28 |
| 12H <sup>+</sup> (E) | 11                                          | 2.666              | 1.427              | 1.65               | 159.45 | 0.95   | 36.64                | 2.55   | 39.19  | 0.715            | 0.485           | 0.186          | 180.91 |
| 12H <sup>+</sup> (Z) | 9.35                                        | 2.706              | 1.422              | 1.702              | 159.17 | 2.86   | 35.82                | 8.56   | 44.38  | 0.7198           | 0.6431          | 0.1881         | 187    |
| 13H <sup>+</sup> (E) | 11.02                                       | 2.663              | 1.429              | 1.65               | 158.89 | 8.95   | 37.15                | 2.93   | 40.07  | 0.7151           | 0.5278          | 0.1868         | 180.28 |
| 13H <sup>+</sup> (Z) | 9.39                                        | 2.701              | 1.425              | 1.7                | 157.86 | 12.91  | 37.47                | 5.56   | 43.03  | 0.7204           | 0.6565          | 0.1889         | 187    |
| 14H <sup>+</sup> (E) | 9.95                                        | 2.676              | 1.429              | 1.682              | 154.89 | 0.2    | 36.81                | 2.28   | 39.09  | 0.7135           | 0.5011          | 0.1855         | 180.63 |
| 14H <sup>+</sup> (Z) | 8.01                                        | 2.728              | 1.422              | 1.75               | 154.03 | 4.75   | 36.01                | 10.21  | 46.22  | 0.7197           | 0.6817          | 0.1882         | 187.91 |
| 15H <sup>+</sup> (E) | 9.06                                        | 2.695              | 1.42               | 1.711              | 154.12 | 1.57   | 35.68                | 3.41   | 39.09  | 0.7116           | 0.5263          | 0.1826         | 180.94 |
| 15H <sup>+</sup> (Z) | 7.37                                        | 2.745              | 1.415              | 1.775              | 153.21 | 10.2   | 35.37                | 9.33   | 44.7   | 0.7159           | 0.6596          | 0.185          | 186.97 |
| 16H <sup>+</sup> (E) | 9.55                                        | 2.683              | 1.428              | 1.695              | 154.38 | 0.08   | 36.75                | 2.63   | 39.38  | 0.7129           | 0.5125          | 0.1856         | 179.96 |
| 16H <sup>+</sup> (Z) | 7.72                                        | 2.735              | 1.421              | 1.762              | 153.54 | 5.51   | 36.06                | 9.18   | 45.24  | 0.7186           | 0.6304          | 0.1881         | 187.33 |
| 17H <sup>+</sup> (E) | 9.54                                        | 2.687              | 1.421              | 1.695              | 155.12 | 2.23   | 35.42                | 2.67   | 38.09  | 0.7125           | 0.497           | 0.1826         | 181.65 |
| 17H <sup>+</sup> (Z) | 7.76                                        | 2.738              | 1.416              | 1.76               | 154.29 | 7.48   | 34.6                 | 9.96   | 44.56  | 0.7173           | 0.6326          | 0.185          | 187.25 |
| 18H <sup>+</sup> (E) | 9.24                                        | 2.69               | 1.417              | 1.706              | 154.25 | 0.96   | 31.13                | 1.87   | 32.99  | 0.7091           | 0.4786          | 0.1807         | 181.09 |
| 18H <sup>+</sup> (Z) | 7.81                                        | 2.732              | 1.412              | 1.76               | 153.55 | 10.69  | 31.31                | 8.55   | 39.86  | 0.7118           | 0.5834          | 0.1824         | 185.62 |
| 19H <sup>+</sup> (E) | 9.37                                        | 2.688              | 1.424              | 1.703              | 154.23 | 1.72   | 30.33                | 0.71   | 31.04  | 0.7179           | 0.4568          | 0.1776         | 179.47 |
| 19H <sup>+</sup> (Z) | 8.1                                         | 2.724              | 1.421              | 1.748              | 153.6  | 12.34  | 32.55                | 11.35  | 43.9   | 0.726            | 0.6704          | 0.1796         | 186.4  |
| 20H <sup>+</sup> (E) | 9.32                                        | 2.683              | 1.424              | 1.706              | 153.19 | 9.66   | 27.32                | 2.13   | 29.45  | 0.7161           | 0.4992          | 0.1804         | 177.42 |
| 20H <sup>+</sup> (Z) | 9                                           | 2.694              | 1.424              | 1.717              | 152.93 | 18.11  | 33.68                | 7.09   | 40.77  | 0.7328           | 0.6636          | 0.1828         | 186.75 |
| 21H <sup>+</sup> (E) | 10.67                                       | 2.652              | 1.424              | 1.66               | 154.79 | 3.36   | 36.32                | 2.35   | 38.67  | 0.7139           | 0.486           | 0.1844         | 181.34 |
| 21H <sup>+</sup> (Z) | 8.75                                        | 2.7                | 1.418              | 1.723              | 153.81 | 12.5   | 36.15                | 9.88   | 46.04  | 0.7177           | 0.6512          | 0.1862         | 187.12 |
| 22H <sup>+</sup> (E) | 10.13                                       | 2.669              | 1.433              | 1.677              | 154.64 | 3.28   | 37                   | 1.45   | 38.45  | 0.714            | 0.5156          | 0.1873         | 179.9  |
| 22H <sup>+</sup> (Z) | 8.02                                        | 2.725              | 1.426              | 1.75               | 153.51 | 2.17   | 36.03                | 10.06  | 46.08  | 0.7214           | 0.6261          | 0.1904         | 187.68 |
| 23H <sup>+</sup> (E) | 9.38                                        | 2.686              | 1.417              | 1.7                | 154.32 | 7.32   | 35.25                | 4.58   | 39.84  | 0.7113           | 0.5302          | 0.1809         | 181.8  |
| 23H <sup>+</sup> (Z) | 7.66                                        | 2.734              | 1.413              | 1.763              | 153.17 | 16.69  | 34.32                | 9.9    | 44.22  | 0.7149           | 0.6685          | 0.1832         | 186.79 |
| 24H <sup>+</sup> (E) | 11.25                                       | 2.658              | 1.419              | 1.644              | 159.55 | 4.35   | 31.08                | 1.93   | 33.01  | 0.7111           | 0.4968          | 0.1821         | 181.86 |
| 24H <sup>+</sup> (Z) | 9.66                                        | 2.692              | 1.414              | 1.692              | 158.18 | 17.34  | 31.43                | 9.45   | 40.88  | 0.7207           | 0.6198          | 0.1859         | 184.73 |
| 25H <sup>+</sup> (E) | 11.34                                       | 2.656              | 1.428              | 1.643              | 159.34 | 1.37   | 31.15                | 1.19   | 32.34  | 0.7211           | 0.4518          | 0.1797         | 179.69 |
| 25H <sup>+</sup> (Z) | 10.08                                       | 2.686              | 1.425              | 1.68               | 158.98 | 10.16  | 32.62                | 10.83  | 43.45  | 0.7279           | 0.7009          | 0.1811         | 186.16 |
| 26H <sup>+</sup> (E) | 11.22                                       | 2.653              | 1.433              | 1.648              | 157.49 | 14.92  | 28.96                | 2.22   | 31.18  | 0.7208           | 0.501           | 0.1838         | 177.01 |
| 26H <sup>+</sup> (Z) | 10.11                                       | 2.685              | 1.437              | 1.681              | 157.79 | 9.25   | 35.11                | 8.3    | 43.41  | 0.7536           | 0.6939          | 0.1883         | 187.7  |
| 27H <sup>+</sup> (E) | 11.23                                       | 2.659              | 1.427              | 1.645              | 159.46 | 2.74   | 31.37                | 1.29   | 32.65  | 0.7096           | 0.464           | 0.183          | 180.56 |
| 27H <sup>+</sup> (Z) | 9.72                                        | 2.695              | 1.421              | 1.691              | 159    | 9.46   | 32.1                 | 7.69   | 39.79  | 0.7135           | 0.633           | 0.1844         | 186.41 |
| 28H <sup>+</sup> (E) | 8.47                                        | 2.713              | 1.409              | 1.737              | 155.12 | 8.3    | 18.9                 | 0.92   | 19.82  | 0.711            | 0.4688          | 0.1783         | 180.43 |
| 28H <sup>+</sup> (Z) | 9.7                                         | 2.691              | 1.417              | 1.691              | 157.52 | 10.25  | 39.26                | 12.21  | 51.47  | 0.7428           | 0.5242          | 0.1896         | 188.47 |
| 29H <sup>+</sup> (E) | 9.8                                         | 2.686              | 1.422              | 1.687              | 156.4  | 1.42   | 35.72                | 1.31   | 37.03  | 0.7245           | 0.4799          | 0.1833         | 181.69 |
| 29H <sup>+</sup> (Z) | 8.7                                         | 2.716              | 1.42               | 1.724              | 156.32 | 7.53   | 36.74                | 10.83  | 47.57  | 0.731            | 0.5974          | 0.1856         | 187.78 |
| 30H <sup>+</sup> (E) | 11.94                                       | 2.637              | 1.437              | 1.628              | 157.59 | 16.34  | 29.73                | 1.86   | 31.59  | 0.7212           | 0.5344          | 0.1851         | 176.79 |
| 30H <sup>+</sup> (Z) | 11.19                                       | 2.654              | 1.434              | 1.649              | 157.19 | 21.67  | 35.03                | 5.89   | 40.91  | 0.7361           | 0.6756          | 0.1864         | 186.71 |
| 31H <sup>+</sup> (E) | 8.8                                         | 2.701              | 1.416              | 1.722              | 153.89 | 0.48   | 30.4                 | 2.27   | 32.67  | 0.7103           | 0.4934          | 0.1829         | 181.06 |
| 31H <sup>+</sup> (Z) | 6.91                                        | 2.761              | 1.412              | 1.796              | 153.09 | 8.67   | 33.64                | 9.9    | 43.55  | 0.7152           | 0.676           | 0.1848         | 186.85 |
| 32H <sup>+</sup> (E) | 5.51                                        | 2.787              | 1.572              | 1.862              | 146.87 | 0.24   | 53.28                | 44.02  | 97.29  | 0.775            | 0.4957          | 0.2414         | 175.43 |
| 32H <sup>+</sup> (Z) | 7.12                                        | 2.74               | 1.586              | 1.788              | 150.75 | 1      | 49.85                | 40.19  | 90.03  | 0.7721           | 0.6708          | 0.2379         | 174.26 |
| 33H <sup>+</sup> (E) | 6.24                                        | 2.711              | 1.397              | 1.823              | 143.35 | 5.81   | 24.18                | 1.05   | 25.23  | 0.7144           | 0.5456          | 0.1791         | 181.11 |
| 33H <sup>+</sup> (Z) | 4.6                                         | 2.775              | 1.391              | 1.914              | 140.47 | 6.14   | 27.72                | 6.37   | 34.09  | None             | 0.6927          | 0.1784         | 184.78 |
| 34H <sup>+</sup> (E) | -                                           | 2.786              | 1.374              | 2.632              | 87.97  | 5.54   | 10.52                | 13.08  | 23.6   | 0.696            | 0.6122          | 0.1706         | 181.45 |
| 34H <sup>+</sup> (Z) | -                                           | 2.831              | 1.379              | 2.405              | 104.49 | 11.96  | 22.7                 | 5.8    | 28.5   | 0.7102           | 0.6566          | 0.1697         | 181.7  |
| 35H <sup>+</sup> (E) | 5.45                                        | 2.72               | 1.408              | 1.867              | 138.71 | 1.4    | 28.03                | 0.37   | 28.4   | 0.7111           | 0.4963          | 0.1824         | 180.71 |
| 35H <sup>+</sup> (Z) | 4.39                                        | 2.763              | 1.404              | 1.93               | 136.83 | 11     | 29.9                 | 6.68   | 36.58  | 0.7051           | 0.554           | 0.1779         | 183.94 |
| 36H <sup>+</sup> (E) | 5.56                                        | 2.71               | 1.41               | 1.863              | 138.15 | 1.88   | 24.37                | 0.02   | 24.4   | 0.72             | 0.4614          | 0.1787         | 180.09 |
| 36H <sup>+</sup> (Z) | 4.77                                        | 2.738              | 1.407              | 1.908              | 136.29 | 13.88  | 27.56                | 9.18   | 36.75  | 0.715            | 0.6827          | 0.1725         | 184.01 |
| 37H <sup>+</sup> (E) | -                                           | 2.693              | 1.401              | 2.247              | 105.03 | 56.29  | 5.49                 | 18.03  | 23.51  | 0.7115           | 0.7315          | 0.1749         | 178.2  |

|         |       |       |       |       |        |       |       |       |       |        |        |        |        |
|---------|-------|-------|-------|-------|--------|-------|-------|-------|-------|--------|--------|--------|--------|
| 37H*(Z) | -     | 2.72  | 1.403 | 2.24  | 107.45 | 57.78 | 19.16 | 0.25  | 19.4  | 0.708  | 0.4688 | 0.1751 | 174.27 |
| 38H*(E) | 11.54 | 2.661 | 1.435 | 1.635 | 163.63 | 53.28 | 28.33 | 21.63 | 49.95 | 0.7347 | 0.587  | 0.1961 | 186.46 |
| 38H*(Z) | 10.87 | 2.683 | 1.441 | 1.651 | 165.1  | 55.6  | 36.22 | 4.8   | 41.02 | 0.7209 | 0.5297 | 0.1896 | 177.84 |
| 39H*(E) | 8.84  | 2.768 | 1.419 | 1.717 | 176.45 | 1.07  | 34.81 | 3.21  | 38.01 | 0.7164 | 0.4696 | 0.1859 | 184.61 |
| 39H*(Z) | 8.15  | 2.791 | 1.421 | 1.741 | 176.68 | 17.66 | 39.22 | 9.41  | 48.63 | 0.7143 | 0.6892 | 0.185  | 186.89 |
| 40H*(E) | 5.45  | 2.785 | 1.411 | 1.874 | 146.21 | 4.4   | 0.34  | 18.67 | 19.01 | 0.7106 | 0.7117 | 0.1857 | 181.47 |
| 40H*(Z) | 5.98  | 2.791 | 1.417 | 1.84  | 150.85 | 4.15  | 30.24 | 4.79  | 35.03 | 0.7144 | 0.5619 | 0.1826 | 184.04 |
| 41H*(E) | 6.78  | 2.755 | 1.454 | 1.801 | 151.25 | 3.25  | 33.17 | 5.1   | 38.28 | 0.7197 | 0.5279 | 0.1916 | 176.5  |
| 41H*(Z) | 6.25  | 2.777 | 1.455 | 1.824 | 151.95 | 3.34  | 30.19 | 20.68 | 50.87 | 0.7366 | 0.721  | 0.2015 | 184.37 |
| 42H*(E) | 7.61  | 2.65  | 1.412 | 1.726 | 146.56 | 7.47  | -     | -     | -     | 0.8345 | 0.7352 | 0.2397 | 177.94 |
| 42H*(Z) | 7.59  | 2.657 | 1.419 | 1.721 | 148.52 | 1.66  | -     | -     | -     | 0.8182 | 0.7119 | 0.2313 | 173.3  |
| 43H*(E) | 10.41 | 2.65  | 1.429 | 1.667 | 153.02 | 18.5  | 37.64 | 11.07 | 48.71 | 0.7246 | 0.5938 | 0.1881 | 182.49 |
| 43H*(Z) | 10.7  | 2.649 | 1.429 | 1.663 | 154.42 | 17.87 | 29.57 | 21.74 | 51.31 | 0.7232 | 0.6157 | 0.1892 | 185.82 |
| 44H*(E) | 3.46  | 2.721 | 1.419 | 2.023 | 122.19 | 0.96  | 32.02 | 2.7   | 34.72 | 0.7089 | 0.592  | 0.1814 | 177.07 |
| 44H*(Z) | -     | 2.95  | 1.372 | 2.544 | 101.5  | 3.35  | 12.79 | 10.42 | 23.2  | 0.7354 | 0.61   | 0.1983 | 187.41 |

\* colour chart should be considered within each column

Table S3. Geometric and electronic parameters of amides 9-44 in vacuum.

| Compd | $r_1$ , Å | $r_2$ , Å | $\omega$ , deg | $\chi_N$ , deg | $\tau$ , deg | $\vartheta$ , deg | $q_{NPA}$ | $q_{MK}$ | $q_H$  | $\delta$ , ppm |
|-------|-----------|-----------|----------------|----------------|--------------|-------------------|-----------|----------|--------|----------------|
| 9(E)  | 2.793*    | 1.374     | 4.57           | 17.71          | 6.22         | 23.93             | 0.6737    | 0.3285   | 0.1639 | 174.7          |
| 9(Z)  | 2.813     | 1.371     | 18.07          | 5.84           | 7.88         | 13.72             | 0.6805    | 0.5216   | 0.1656 | 178.03         |
| 10(E) | 2.789     | 1.372     | 14.81          | 10.6           | 4.32         | 14.92             | 0.6994    | 0.6232   | 0.1658 | 174.9          |
| 10(Z) | 2.792     | 1.374     | 19.41          | 8.56           | 2.02         | 10.58             | 0.7027    | 0.7095   | 0.1698 | 175.97         |
| 11(E) | 2.766     | 1.369     | 2.43           | 12.33          | 4.14         | 16.46             | 0.6996    | 0.5665   | 0.1649 | 174.94         |
| 11(Z) | 2.763     | 1.371     | 10.39          | 11.05          | 2.76         | 13.81             | 0.7004    | 0.7082   | 0.1677 | 175.59         |
| 12(E) | 2.764     | 1.37      | 0.58           | 12.46          | 3.94         | 16.4              | 0.7004    | 0.5863   | 0.1659 | 174.56         |
| 12(Z) | 2.762     | 1.373     | 10.82          | 12.18          | 2.38         | 14.57             | 0.7013    | 0.6724   | 0.1688 | 175.58         |
| 13(E) | 2.787     | 1.375     | 9.26           | 14.05          | 5.81         | 19.86             | 0.7008    | 0.5761   | 0.1675 | 175.37         |
| 13(Z) | 2.782     | 1.376     | 14.54          | 12.29          | 2.81         | 15.1              | 0.7032    | 0.6557   | 0.1706 | 176.2          |
| 14(E) | 2.789     | 1.376     | 23.14          | 11.23          | 4.08         | 15.3              | 0.6998    | 0.6133   | 0.1675 | 175.39         |
| 14(Z) | 2.789     | 1.377     | 26.26          | 10.05          | 2.35         | 12.39             | 0.7039    | 0.6904   | 0.1715 | 176.23         |
| 15(E) | 2.777     | 1.372     | 15.76          | 9.72           | 4.39         | 14.11             | 0.6993    | 0.6101   | 0.1658 | 174.83         |
| 15(Z) | 2.783     | 1.374     | 20.48          | 7.28           | 1.87         | 9.15              | 0.703     | 0.6956   | 0.17   | 175.87         |
| 16(E) | 2.768     | 1.377     | 18.89          | 10.69          | 4.7          | 15.39             | 0.7006    | 0.5987   | 0.1689 | 174.74         |
| 16(Z) | 2.77      | 1.378     | 22.78          | 8.56           | 2.12         | 10.67             | 0.7049    | 0.6921   | 0.1731 | 176.14         |
| 17(E) | 2.78      | 1.371     | 17.02          | 10.05          | 3.8          | 13.86             | 0.6988    | 0.5579   | 0.1647 | 175.12         |
| 17(Z) | 2.786     | 1.373     | 21.05          | 8.31           | 1.91         | 10.23             | 0.7022    | 0.6569   | 0.1687 | 175.7          |
| 18(E) | 2.761     | 1.37      | 12.03          | 8.33           | 3.78         | 12.11             | 0.7038    | 0.5608   | 0.1664 | 175.73         |
| 18(Z) | 2.774     | 1.37      | 18.88          | 4.82           | 2.67         | 7.48              | 0.7105    | 0.586    | 0.1723 | 174.73         |
| 19(E) | 2.764     | 1.375     | 9.81           | 8.06           | 2.23         | 10.29             | 0.7129    | 0.5787   | 0.1634 | 175.22         |
| 19(Z) | 2.774     | 1.375     | 13.02          | 9.67           | 4.82         | 14.49             | 0.7169    | 0.7832   | 0.1654 | 176.16         |
| 20(E) | 2.775     | 1.379     | 14.57          | 9.21           | 0.8          | 10.01             | 0.7087    | 0.6059   | 0.1668 | 174.48         |
| 20(Z) | 2.767     | 1.378     | 17.32          | 15.12          | 2.23         | 17.35             | 0.7186    | 0.7222   | 0.1698 | 178.22         |
| 21(E) | 2.741     | 1.372     | 21.71          | 9.18           | 3.94         | 13.12             | 0.6986    | 0.6348   | 0.1655 | 174.77         |
| 21(Z) | 2.749     | 1.374     | 25.31          | 6.92           | 1.61         | 8.53              | 0.7032    | 0.6983   | 0.1701 | 175.63         |
| 22(E) | 2.802     | 1.382     | 24.13          | 10.32          | 4.85         | 15.17             | 0.7016    | 0.6267   | 0.171  | 175.44         |
| 22(Z) | 2.799     | 1.383     | 26.79          | 8.47           | 2.62         | 11.09             | 0.7067    | 0.6927   | 0.1751 | 176.67         |
| 23(E) | 2.759     | 1.37      | 20.89          | 8.34           | 3.69         | 12.02             | 0.6984    | 0.6383   | 0.1644 | 175.06         |
| 23(Z) | 2.767     | 1.373     | 24.66          | 6.14           | 1.55         | 7.69              | 0.7026    | 0.6974   | 0.169  | 175.73         |
| 24(E) | 2.746     | 1.368     | 2.21           | 10.96          | 4.12         | 15.08             | 0.7036    | 0.5657   | 0.166  | 175.69         |
| 24(Z) | 2.747     | 1.367     | 9.4            | 8.83           | 2.98         | 11.81             | 0.7078    | 0.6294   | 0.1704 | 174.47         |
| 25(E) | 2.748     | 1.373     | 10.2           | 8.58           | 1.63         | 10.21             | 0.7108    | 0.5527   | 0.1646 | 174.31         |
| 25(Z) | 2.749     | 1.373     | 3.26           | 11.04          | 4.92         | 15.96             | 0.7133    | 0.7302   | 0.1651 | 176.55         |
| 26(E) | 2.779     | 1.382     | 8.56           | 11.65          | 2.58         | 14.24             | 0.7085    | 0.5758   | 0.1677 | 174.72         |
| 26(Z) | 2.758     | 1.381     | 13.07          | 17.35          | 2.67         | 20.02             | 0.7186    | 0.7469   | 0.17   | 178.58         |
| 27(E) | 2.785     | 1.377     | 3.56           | 12.27          | 4.1          | 16.37             | 0.7032    | 0.5552   | 0.1678 | 176.7          |
| 27(Z) | 2.775     | 1.376     | 10.46          | 11.25          | 2.69         | 13.94             | 0.7046    | 0.7329   | 0.1698 | 177.95         |
| 28(E) | 2.822     | 1.377     | 1.14           | 1.63           | 9.7          | 11.33             | 0.7387    | 0.5277   | 0.1731 | 176.66         |

|       |       |       |       |       |       |       |        |        |        |        |
|-------|-------|-------|-------|-------|-------|-------|--------|--------|--------|--------|
| 28(Z) | 2.801 | 1.364 | 1.29  | 8.49  | 4.36  | 12.85 | 0.7297 | 0.5742 | 0.1719 | 178.8  |
| 29(E) | 2.754 | 1.367 | 5.81  | 11    | 1.8   | 12.8  | 0.7091 | 0.5776 | 0.1657 | 175.03 |
| 29(Z) | 2.753 | 1.369 | 0.36  | 12.75 | 2.92  | 15.67 | 0.7122 | 0.7631 | 0.167  | 176.05 |
| 30(E) | 2.763 | 1.385 | 19.18 | 13.14 | 1.72  | 14.86 | 0.7095 | 0.5776 | 0.1686 | 175.15 |
| 30(Z) | 2.748 | 1.384 | 21.7  | 19.57 | 2.45  | 22.01 | 0.7205 | 0.7171 | 0.1711 | 179.06 |
| 31(E) | 2.788 | 1.371 | 16.25 | 10.75 | 3.63  | 14.38 | 0.699  | 0.6029 | 0.1678 | 175.12 |
| 31(Z) | 2.812 | 1.383 | 18.99 | 13.01 | 5.97  | 18.98 | 0.7228 | 0.6168 | 0.17   | 174.44 |
| 32(E) | 2.823 | 1.381 | 8.54  | 21.84 | 5.96  | 27.8  | 0.7035 | 0.5569 | 0.1633 | 176.59 |
| 32(Z) | 2.836 | 1.38  | 1.46  | 18.4  | 2.37  | 20.77 | 0.7104 | 0.6047 | 0.1629 | 178.19 |
| 33(E) | 2.73  | 1.365 | 12.38 | 10.73 | 0.07  | 10.8  | 0.7314 | 0.676  | 0.1705 | 178.37 |
| 33(Z) | 2.742 | 1.366 | 21.8  | 0.8   | 4.3   | 5.11  | 0.7123 | 0.715  | 0.1676 | 177.01 |
| 34(E) | 2.749 | 1.373 | 1.11  | 10.73 | 1.33  | 12.06 | 0.7349 | 0.5331 | 0.1715 | 178.73 |
| 34(Z) | 2.773 | 1.367 | 5.39  | 13.97 | 1.29  | 15.26 | 0.7174 | 0.6641 | 0.1662 | 176.31 |
| 35(E) | 2.779 | 1.371 | 3.67  | 6.02  | 3.54  | 9.56  | 0.7207 | 0.546  | 0.1735 | 176.65 |
| 35(Z) | 2.777 | 1.375 | 20.53 | 11.14 | 3.95  | 15.09 | 0.7167 | 0.7142 | 0.1686 | 177.77 |
| 36(E) | 2.748 | 1.373 | 2.91  | 5.23  | 0.69  | 5.92  | 0.7283 | 0.54   | 0.1725 | 175.9  |
| 36(Z) | 2.755 | 1.374 | 18.61 | 9.79  | 5.06  | 14.86 | 0.7297 | 0.886  | 0.1667 | 177.77 |
| 37(E) | 2.679 | 1.379 | 60.77 | 4.69  | 5.3   | 9.99  | 0.7059 | 0.6814 | 0.1673 | 173.52 |
| 37(Z) | 2.671 | 1.378 | 61.06 | 5.96  | 3.14  | 9.1   | 0.705  | 0.6487 | 0.1663 | 172.01 |
| 38(E) | 2.769 | 1.38  | 63.09 | 1.81  | 9.07  | 10.88 | 0.7129 | 0.68   | 0.1714 | 175.38 |
| 38(Z) | 2.79  | 1.381 | 65.21 | 9.45  | 3.81  | 13.26 | 0.705  | 0.6553 | 0.1687 | 171.77 |
| 39(E) | 2.927 | 1.384 | 21.08 | 10.9  | 6.53  | 17.43 | 0.7306 | 0.5794 | 0.1742 | 178.11 |
| 39(Z) | 2.922 | 1.388 | 28.97 | 13.61 | 4.71  | 18.32 | 0.7242 | 0.5965 | 0.1709 | 171.58 |
| 40(E) | 2.798 | 1.392 | 11.56 | 8.95  | 8.47  | 17.42 | 0.714  | 0.73   | 0.1773 | 175.23 |
| 40(Z) | 2.825 | 1.389 | 22.93 | 10.02 | 10.99 | 21.02 | 0.7132 | 0.7346 | 0.1778 | 177.18 |
| 41(E) | 2.801 | 1.414 | 11.48 | 13.48 | 5.03  | 18.5  | 0.738  | 0.5798 | 0.1851 | 176.56 |
| 41(Z) | 2.776 | 1.417 | 12.95 | 10.41 | 6.11  | 16.52 | 0.7425 | 0.6845 | 0.1878 | 174.69 |
| 42(E) | 2.737 | 1.38  | 5.19  | -     | -     | -     | 0.8475 | 0.6931 | 0.2177 | 173.58 |
| 42(Z) | 2.736 | 1.373 | 10.64 | -     | -     | -     | 0.8402 | 0.7628 | 0.2164 | 174.57 |
| 43(E) | 2.782 | 1.379 | 31.49 | 18.64 | 4.7   | 23.34 | 0.715  | 0.6641 | 0.172  | 177.8  |
| 43(Z) | 2.785 | 1.381 | 32.72 | 12.15 | 7.12  | 19.27 | 0.7085 | 0.6622 | 0.1686 | 174.17 |
| 44(E) | 2.899 | 1.382 | 1.37  | 8.83  | 2.15  | 10.98 | 0.711  | 0.5638 | 0.1723 | 175.96 |
| 44(Z) | 2.832 | 1.375 | 4.72  | 7.8   | 3.86  | 11.66 | 0.6971 | 0.6724 | 0.168  | 176.19 |

\* colour chart should be considered within each column

**Table S4.** Change of geometric and electronic parameters during transition from **9-44** to **9H<sup>+</sup>-44H<sup>+</sup>** in vacuum.

| Compd                | $\Delta r_1$ , Å | $\Delta r_2$ , Å | $\Delta \omega$ , deg | $\Delta \chi_N$ , deg | $\Delta \tau$ , deg | $\Delta \theta$ , deg | $\Delta q_{NPA}$ | $\Delta q_{MK}$ | $\Delta q_H$ | $\Delta \delta$ , ppm |
|----------------------|------------------|------------------|-----------------------|-----------------------|---------------------|-----------------------|------------------|-----------------|--------------|-----------------------|
| 9H <sup>+</sup> (E)  | -0.106*          | 0.057            | 0.75                  | 24.58                 | 6.59                | 31.17                 | 0.0194           | 0.0509          | 0.0137       | 4.21                  |
| 9H <sup>+</sup> (Z)  | -0.051           | 0.043            | -12.15                | 19.7                  | 11.21               | 30.91                 | 0.0176           | 0.0907          | 0.0117       | 7.34                  |
| 10H <sup>+</sup> (E) | -0.092           | 0.052            | -14.25                | 25.06                 | -2.24               | 22.82                 | 0.0129           | -0.1347         | 0.0178       | 5.89                  |
| 10H <sup>+</sup> (Z) | -0.041           | 0.044            | -14.95                | 26.57                 | 7.58                | 34.15                 | 0.0148           | -0.0586         | 0.0164       | 11.27                 |
| 11H <sup>+</sup> (E) | -0.101           | 0.057            | 2.61                  | 23.91                 | -1.97               | 21.94                 | 0.0153           | -0.0626         | 0.0205       | 6.5                   |
| 11H <sup>+</sup> (Z) | -0.055           | 0.049            | -1.4                  | 25.16                 | 5.77                | 30.93                 | 0.0193           | -0.065          | 0.0197       | 11.68                 |
| 12H <sup>+</sup> (E) | -0.098           | 0.057            | 0.37                  | 24.18                 | -1.39               | 22.8                  | 0.0146           | -0.1014         | 0.0201       | 6.35                  |
| 12H <sup>+</sup> (Z) | -0.056           | 0.049            | -7.97                 | 23.64                 | 6.18                | 29.81                 | 0.0186           | -0.0293         | 0.0193       | 11.43                 |
| 13H <sup>+</sup> (E) | -0.124           | 0.054            | -0.32                 | 23.1                  | -2.89               | 20.22                 | 0.0142           | -0.0483         | 0.0193       | 4.91                  |
| 13H <sup>+</sup> (Z) | -0.081           | 0.048            | -1.63                 | 25.18                 | 2.75                | 27.93                 | 0.0173           | 0.0009          | 0.0183       | 10.79                 |
| 14H <sup>+</sup> (E) | -0.113           | 0.053            | -22.94                | 25.59                 | -1.8                | 23.79                 | 0.0137           | -0.1122         | 0.018        | 5.23                  |
| 14H <sup>+</sup> (Z) | -0.061           | 0.044            | -21.5                 | 25.96                 | 7.87                | 33.83                 | 0.0157           | -0.0087         | 0.0166       | 11.69                 |
| 15H <sup>+</sup> (E) | -0.081           | 0.049            | -14.19                | 25.96                 | -0.98               | 24.98                 | 0.0123           | -0.0838         | 0.0168       | 6.11                  |
| 15H <sup>+</sup> (Z) | -0.038           | 0.041            | -10.29                | 28.09                 | 7.47                | 35.55                 | 0.0129           | -0.036          | 0.015        | 11.09                 |
| 16H <sup>+</sup> (E) | -0.085           | 0.051            | -18.81                | 26.05                 | -2.06               | 23.99                 | 0.0123           | -0.0862         | 0.0167       | 5.22                  |
| 16H <sup>+</sup> (Z) | -0.035           | 0.043            | -17.27                | 27.5                  | 7.06                | 34.57                 | 0.0137           | -0.0617         | 0.015        | 11.19                 |
| 17H <sup>+</sup> (E) | -0.093           | 0.05             | -14.79                | 25.37                 | -1.13               | 24.24                 | 0.0137           | -0.0609         | 0.0178       | 6.54                  |
| 17H <sup>+</sup> (Z) | -0.048           | 0.043            | -13.56                | 26.28                 | 8.05                | 34.33                 | 0.0152           | -0.0243         | 0.0163       | 11.55                 |
| 18H <sup>+</sup> (E) | -0.071           | 0.047            | -11.07                | 22.79                 | -1.91               | 20.88                 | 0.0053           | -0.0822         | 0.0143       | 5.37                  |
| 18H <sup>+</sup> (Z) | -0.042           | 0.043            | -8.2                  | 26.49                 | 5.88                | 32.38                 | 0.0013           | -0.0026         | 0.0101       | 10.9                  |
| 19H <sup>+</sup> (E) | -0.076           | 0.049            | -8.08                 | 22.27                 | -1.52               | 20.75                 | 0.0051           | -0.1218         | 0.0142       | 4.25                  |
| 19H <sup>+</sup> (Z) | -0.05            | 0.046            | -0.68                 | 22.88                 | 6.53                | 29.4                  | 0.0091           | -0.1128         | 0.0142       | 10.24                 |

|                      |        |        |        |       |       |       |         |         |         |       |
|----------------------|--------|--------|--------|-------|-------|-------|---------|---------|---------|-------|
| 20H <sup>+</sup> (E) | -0.091 | 0.046  | -4.91  | 18.11 | 1.33  | 19.45 | 0.0074  | -0.1068 | 0.0136  | 2.94  |
| 20H <sup>+</sup> (Z) | -0.073 | 0.047  | 0.79   | 18.56 | 4.86  | 23.42 | 0.0142  | -0.0586 | 0.0131  | 8.53  |
| 21H <sup>+</sup> (E) | -0.089 | 0.052  | -18.35 | 27.15 | -1.59 | 25.56 | 0.0152  | -0.1489 | 0.0189  | 6.57  |
| 21H <sup>+</sup> (Z) | -0.049 | 0.044  | -12.81 | 29.23 | 8.27  | 37.51 | 0.0145  | -0.0471 | 0.0162  | 11.49 |
| 22H <sup>+</sup> (E) | -0.133 | 0.052  | -20.84 | 26.68 | -3.41 | 23.28 | 0.0124  | -0.1111 | 0.0163  | 4.46  |
| 22H <sup>+</sup> (Z) | -0.074 | 0.043  | -24.62 | 27.56 | 7.44  | 35    | 0.0146  | -0.0667 | 0.0154  | 11    |
| 23H <sup>+</sup> (E) | -0.073 | 0.047  | -13.56 | 26.92 | 0.9   | 27.82 | 0.0129  | -0.1081 | 0.0165  | 6.73  |
| 23H <sup>+</sup> (Z) | -0.033 | 0.04   | -7.96  | 28.18 | 8.35  | 36.53 | 0.0123  | -0.0289 | 0.0142  | 11.07 |
| 24H <sup>+</sup> (E) | -0.088 | 0.051  | 2.14   | 20.12 | -2.19 | 17.93 | 0.0075  | -0.0689 | 0.0161  | 6.17  |
| 24H <sup>+</sup> (Z) | -0.055 | 0.046  | 7.94   | 22.6  | 6.47  | 29.07 | 0.013   | -0.0096 | 0.0155  | 10.26 |
| 25H <sup>+</sup> (E) | -0.091 | 0.055  | -8.83  | 22.57 | -0.44 | 22.13 | 0.0103  | -0.1009 | 0.0151  | 5.38  |
| 25H <sup>+</sup> (Z) | -0.063 | 0.051  | 6.9    | 21.58 | 5.91  | 27.49 | 0.0146  | -0.0293 | 0.016   | 9.61  |
| 26H <sup>+</sup> (E) | -0.127 | 0.051  | 6.36   | 17.31 | -0.37 | 16.94 | 0.0123  | -0.0747 | 0.0161  | 2.3   |
| 26H <sup>+</sup> (Z) | -0.074 | 0.057  | -3.82  | 17.77 | 5.63  | 23.39 | 0.035   | -0.053  | 0.0184  | 9.12  |
| 27H <sup>+</sup> (E) | -0.126 | 0.05   | -0.83  | 19.1  | -2.81 | 16.28 | 0.0064  | -0.0913 | 0.0152  | 3.86  |
| 27H <sup>+</sup> (Z) | -0.08  | 0.046  | -1     | 20.85 | 5     | 25.85 | 0.009   | -0.0998 | 0.0147  | 8.46  |
| 28H <sup>+</sup> (E) | -0.109 | 0.032  | 7.16   | 17.27 | -8.78 | 8.48  | -0.0277 | -0.0589 | 0.0052  | 3.77  |
| 28H <sup>+</sup> (Z) | -0.11  | 0.053  | 8.96   | 30.77 | 7.85  | 38.63 | 0.0131  | -0.0501 | 0.0177  | 9.66  |
| 29H <sup>+</sup> (E) | -0.068 | 0.055  | -4.39  | 24.73 | -0.49 | 24.24 | 0.0154  | -0.0976 | 0.0176  | 6.65  |
| 29H <sup>+</sup> (Z) | -0.038 | 0.052  | 7.17   | 23.99 | 7.91  | 31.9  | 0.0188  | -0.1657 | 0.0186  | 11.73 |
| 30H <sup>+</sup> (E) | -0.126 | 0.052  | -2.84  | 16.59 | 0.14  | 16.73 | 0.0118  | -0.0432 | 0.0165  | 1.64  |
| 30H <sup>+</sup> (Z) | -0.094 | 0.05   | -0.03  | 15.46 | 3.44  | 18.9  | 0.0156  | -0.0416 | 0.0153  | 7.66  |
| 31H <sup>+</sup> (E) | -0.087 | 0.045  | -15.78 | 19.64 | -1.36 | 18.28 | 0.0114  | -0.1095 | 0.0151  | 5.94  |
| 31H <sup>+</sup> (Z) | -0.051 | 0.028  | -10.32 | 20.63 | 3.93  | 24.56 | -0.0076 | 0.0592  | 0.0148  | 12.41 |
| 32H <sup>+</sup> (E) | -0.036 | 0.191  | -8.3   | 31.44 | 38.06 | 69.5  | 0.0715  | -0.0612 | 0.0781  | -1.15 |
| 32H <sup>+</sup> (Z) | -0.096 | 0.206  | -0.46  | 31.45 | 37.81 | 69.26 | 0.0617  | 0.0661  | 0.0749  | -3.93 |
| 33H <sup>+</sup> (E) | -0.019 | 0.032  | -6.57  | 13.45 | 0.97  | 14.43 | -0.017  | -0.1304 | 0.0086  | 2.74  |
| 33H <sup>+</sup> (Z) | 0.034  | 0.025  | -15.67 | 26.91 | 2.07  | 28.98 | None    | -0.0223 | 0.0107  | 7.78  |
| 34H <sup>+</sup> (E) | 0.037  | 0.001  | 4.43   | -0.21 | 11.75 | 11.54 | -0.0389 | 0.0791  | -0.0009 | 2.72  |
| 34H <sup>+</sup> (Z) | 0.058  | 0.012  | 6.56   | 8.73  | 4.51  | 13.24 | -0.0072 | -0.0076 | 0.0035  | 5.38  |
| 35H <sup>+</sup> (E) | -0.059 | 0.037  | -2.27  | 22.01 | -3.17 | 18.84 | -0.0096 | -0.0497 | 0.0089  | 4.06  |
| 35H <sup>+</sup> (Z) | -0.014 | 0.029  | -9.53  | 18.76 | 2.73  | 21.48 | -0.0115 | -0.1602 | 0.0093  | 6.17  |
| 36H <sup>+</sup> (E) | -0.038 | 0.037  | -1.04  | 19.14 | -0.67 | 18.47 | -0.0083 | -0.0786 | 0.0062  | 4.19  |
| 36H <sup>+</sup> (Z) | -0.017 | 0.032  | -4.73  | 17.77 | 4.12  | 21.89 | -0.0147 | -0.2033 | 0.0059  | 6.24  |
| 37H <sup>+</sup> (E) | 0.013  | 0.022  | -4.48  | 0.8   | 12.73 | 13.53 | 0.0057  | 0.0501  | 0.0076  | 4.67  |
| 37H <sup>+</sup> (Z) | 0.05   | 0.025  | -3.27  | 13.2  | -2.89 | 10.31 | 0.003   | -0.1799 | 0.0088  | 2.25  |
| 38H <sup>+</sup> (E) | -0.108 | 0.055  | -9.81  | 26.52 | 12.56 | 39.08 | 0.0218  | -0.0929 | 0.0248  | 11.09 |
| 38H <sup>+</sup> (Z) | -0.107 | 0.06   | -9.61  | 26.77 | 0.99  | 27.77 | 0.0159  | -0.1256 | 0.0209  | 6.08  |
| 39H <sup>+</sup> (E) | -0.159 | 0.035  | -20.01 | 23.91 | -3.33 | 20.58 | -0.0142 | -0.1099 | 0.0117  | 6.5   |
| 39H <sup>+</sup> (Z) | -0.131 | 0.034  | -11.31 | 25.61 | 4.7   | 30.31 | -0.0099 | 0.0926  | 0.0141  | 15.31 |
| 40H <sup>+</sup> (E) | -0.013 | 0.019  | -7.16  | -8.61 | 10.2  | 1.58  | -0.0034 | -0.0183 | 0.0085  | 6.24  |
| 40H <sup>+</sup> (Z) | -0.033 | 0.028  | -18.78 | 20.22 | -6.21 | 14.01 | 0.0013  | -0.1727 | 0.0048  | 6.86  |
| 41H <sup>+</sup> (E) | -0.046 | 0.041  | -8.23  | 19.7  | 0.08  | 19.77 | -0.0183 | -0.0519 | 0.0065  | -0.06 |
| 41H <sup>+</sup> (Z) | 0.001  | 0.038  | -9.6   | 19.78 | 14.57 | 34.36 | -0.006  | 0.0365  | 0.0138  | 9.68  |
| 42H <sup>+</sup> (E) | -0.087 | 0.033  | 2.28   | -     | -     | -     | -0.013  | 0.0421  | 0.022   | 4.36  |
| 42H <sup>+</sup> (Z) | -0.078 | 0.045  | -8.98  | -     | -     | -     | -0.022  | -0.051  | 0.0149  | -1.27 |
| 43H <sup>+</sup> (E) | -0.132 | 0.049  | -12.98 | 19.01 | 6.37  | 25.37 | 0.0097  | -0.0704 | 0.0161  | 4.69  |
| 43H <sup>+</sup> (Z) | -0.136 | 0.048  | -14.84 | 17.42 | 14.62 | 32.04 | 0.0147  | -0.0464 | 0.0207  | 11.65 |
| 44H <sup>+</sup> (E) | -0.179 | 0.037  | -0.42  | 23.19 | 0.55  | 23.74 | -0.0021 | 0.0282  | 0.0091  | 1.11  |
| 44H <sup>+</sup> (Z) | 0.118  | -0.003 | -1.36  | 4.98  | 6.56  | 11.55 | 0.0383  | -0.0624 | 0.0303  | 11.22 |

\* colour chart should be considered within each column

**Table S5.** Geometric and electronic parameters of cations **9H<sup>+</sup>-44H<sup>+</sup>** in acetonitrile (PCM).

| Compd                | E <sub>НВ</sub> , kcal·mol <sup>-1</sup> | r <sub>1</sub> , Å | r <sub>2</sub> , Å | r <sub>3</sub> , Å | α, deg | ω, deg | χ <sub>N</sub> , deg | τ, deg | θ, deg | q <sub>NPA</sub> | q <sub>MK</sub> | q <sub>H</sub> | δ, ppm |
|----------------------|------------------------------------------|--------------------|--------------------|--------------------|--------|--------|----------------------|--------|--------|------------------|-----------------|----------------|--------|
| 9H <sup>+</sup> (E)  | 6.34*                                    | 2.758              | 1.405              | 1.815              | 149.37 | 3.4    | 39.08                | 10.18  | 49.27  | 0.7052           | 0.4563          | 0.1806         | 184.49 |
| 9H <sup>+</sup> (Z)  | 5.76                                     | 2.792              | 1.393              | 1.848              | 150.34 | 3.45   | 24.42                | 9.64   | 34.06  | 0.7046           | 0.4105          | 0.1783         | 187.1  |
| 10H <sup>+</sup> (E) | 6.35                                     | 2.763              | 1.401              | 1.815              | 150.22 | 1.01   | 34.65                | 4.95   | 39.61  | 0.7304           | 0.5783          | 0.1866         | 186.8  |
| 10H <sup>+</sup> (Z) | 6.34                                     | 2.768              | 1.399              | 1.819              | 150.66 | 0.28   | 31.52                | 2.07   | 33.59  | 0.729            | 0.6241          | 0.1872         | 189.88 |
| 11H <sup>+</sup> (E) | 8.59                                     | 2.716              | 1.404              | 1.725              | 157.27 | 1.1    | 36.06                | 6.25   | 42.31  | 0.731            | 0.5772          | 0.1873         | 186.79 |



|         |      |       |       |       |        |       |       |       |       |        |        |        |        |
|---------|------|-------|-------|-------|--------|-------|-------|-------|-------|--------|--------|--------|--------|
| 11H*(Z) | 8.28 | 2.721 | 1.403 | 1.737 | 156.31 | 4.23  | 33.41 | 1.79  | 35.2  | 0.7333 | 0.6365 | 0.1896 | 190.5  |
| 12H*(E) | 8.81 | 2.711 | 1.407 | 1.717 | 157.55 | 0.61  | 36.47 | 6.26  | 42.72 | 0.7318 | 0.5632 | 0.1885 | 186.69 |
| 12H*(Z) | 8.66 | 2.714 | 1.406 | 1.723 | 157.29 | 2.99  | 33.17 | 1.29  | 34.45 | 0.7338 | 0.6447 | 0.1905 | 190.45 |
| 13H*(E) | 9.07 | 2.702 | 1.409 | 1.707 | 157.11 | 8.83  | 36.89 | 5.45  | 42.33 | 0.7321 | 0.5862 | 0.1895 | 186.59 |
| 13H*(Z) | 8.74 | 2.707 | 1.408 | 1.72  | 155.86 | 8     | 34.89 | 0.01  | 34.89 | 0.7364 | 0.6495 | 0.1927 | 191.13 |
| 14H*(E) | 7.02 | 2.737 | 1.406 | 1.785 | 150.24 | 1.36  | 36.55 | 4.95  | 41.5  | 0.7328 | 0.5816 | 0.1898 | 186.77 |
| 14H*(Z) | 7.12 | 2.738 | 1.404 | 1.784 | 150.86 | 2.44  | 33.16 | 2.08  | 35.24 | 0.7321 | 0.6105 | 0.1903 | 190.61 |
| 15H*(E) | 6.89 | 2.745 | 1.4   | 1.792 | 150.86 | 3.28  | 34.31 | 7.28  | 41.59 | 0.7282 | 0.579  | 0.1851 | 186.36 |
| 15H*(Z) | 6.37 | 2.762 | 1.398 | 1.817 | 149.95 | 3.22  | 32.41 | 2.27  | 34.68 | 0.7292 | 0.6358 | 0.1871 | 189.95 |
| 16H*(E) | 6.82 | 2.743 | 1.408 | 1.794 | 150.14 | 2.68  | 36.68 | 5.88  | 42.56 | 0.7327 | 0.6053 | 0.1906 | 186.09 |
| 16H*(Z) | 6.87 | 2.745 | 1.404 | 1.795 | 150.7  | 3.44  | 33.32 | 1.49  | 34.82 | 0.7316 | 0.6171 | 0.191  | 190.28 |
| 17H*(E) | 6.6  | 2.753 | 1.399 | 1.804 | 150.28 | 3.06  | 34.61 | 5.39  | 40    | 0.7303 | 0.585  | 0.1857 | 187.39 |
| 17H*(Z) | 6.74 | 2.757 | 1.398 | 1.8   | 151.67 | 4.48  | 31.35 | 1.63  | 32.98 | 0.7282 | 0.6297 | 0.1861 | 190    |
| 18H*(E) | 6.93 | 2.745 | 1.398 | 1.792 | 151.17 | 0.63  | 30.19 | 4.92  | 35.11 | 0.7232 | 0.5216 | 0.1815 | 186.36 |
| 18H*(Z) | 6.73 | 2.753 | 1.396 | 1.803 | 151.05 | 3.59  | 27.17 | 1.74  | 28.91 | 0.7238 | 0.5338 | 0.1835 | 188.34 |
| 19H*(E) | 6.85 | 2.746 | 1.403 | 1.797 | 150.7  | 3.5   | 29.49 | 5.81  | 35.3  | 0.731  | 0.5018 | 0.1759 | 184.82 |
| 19H*(Z) | 6.5  | 2.759 | 1.402 | 1.812 | 150.38 | 6.56  | 28.94 | 4.52  | 33.46 | 0.7344 | 0.6326 | 0.179  | 188.84 |
| 20H*(E) | 6.02 | 2.765 | 1.403 | 1.834 | 148.12 | 8.03  | 27.72 | 5.16  | 32.88 | 0.7287 | 0.5442 | 0.1785 | 183.12 |
| 20H*(Z) | 6.91 | 2.741 | 1.406 | 1.795 | 150.14 | 13.49 | 30.5  | 1.17  | 31.67 | 0.7385 | 0.6132 | 0.1824 | 187.62 |
| 21H*(E) | 8.34 | 2.697 | 1.402 | 1.734 | 152.03 | 0.39  | 35.33 | 6.49  | 41.83 | 0.7297 | 0.5436 | 0.1861 | 186.67 |
| 21H*(Z) | 8.03 | 2.706 | 1.401 | 1.748 | 151.83 | 2.73  | 32.62 | 2.18  | 34.8  | 0.7306 | 0.6256 | 0.1882 | 189.82 |
| 22H*(E) | 7.62 | 2.719 | 1.414 | 1.762 | 150.94 | 2.6   | 37.12 | 5.69  | 42.81 | 0.733  | 0.5669 | 0.1921 | 185.2  |
| 22H*(Z) | 7.19 | 2.731 | 1.409 | 1.781 | 150.22 | 5.8   | 33.7  | 2.8   | 36.5  | 0.7345 | 0.6699 | 0.1937 | 190.76 |
| 23H*(E) | 6.8  | 2.745 | 1.396 | 1.796 | 150.21 | 11.67 | 33.34 | 8.36  | 41.7  | 0.7267 | 0.5943 | 0.1825 | 187.03 |
| 23H*(Z) | 6.58 | 2.754 | 1.396 | 1.807 | 150.19 | 13.14 | 31.61 | 3.29  | 34.9  | 0.7282 | 0.6272 | 0.1852 | 189.68 |
| 24H*(E) | 9.04 | 2.701 | 1.4   | 1.711 | 157.46 | 4.27  | 30.1  | 4.73  | 34.83 | 0.7252 | 0.5389 | 0.1831 | 186.72 |
| 24H*(Z) | 8.79 | 2.706 | 1.399 | 1.72  | 156.79 | 10.56 | 28.09 | 3.11  | 31.2  | 0.7332 | 0.6314 | 0.1886 | 187.58 |
| 25H*(E) | 9.12 | 2.7   | 1.409 | 1.708 | 157.54 | 0.32  | 30.43 | 4.7   | 35.13 | 0.7342 | 0.4696 | 0.1788 | 185.3  |
| 25H*(Z) | 8.93 | 2.706 | 1.408 | 1.716 | 157.43 | 4.73  | 30    | 4.48  | 34.48 | 0.7383 | 0.6641 | 0.1815 | 189.21 |
| 26H*(E) | 8.98 | 2.696 | 1.413 | 1.714 | 155.34 | 15    | 29.5  | 5.22  | 34.72 | 0.7324 | 0.5092 | 0.1814 | 182.42 |
| 26H*(Z) | 8.67 | 2.707 | 1.416 | 1.726 | 154.91 | 6.21  | 31.34 | 4.03  | 35.37 | 0.7588 | 0.6732 | 0.1867 | 191.19 |
| 27H*(E) | 8.7  | 2.71  | 1.41  | 1.722 | 156.94 | 1.71  | 30.99 | 3.98  | 34.97 | 0.7243 | 0.5125 | 0.1857 | 185.7  |
| 27H*(Z) | 8.64 | 2.713 | 1.408 | 1.725 | 156.94 | 5.7   | 29.51 | 1.34  | 30.85 | 0.7269 | 0.5979 | 0.1878 | 190.14 |
| 28H*(E) | 7.05 | 2.749 | 1.393 | 1.79  | 153.21 | 10.09 | 20.29 | 3.23  | 23.52 | 0.7238 | 0.4439 | 0.1779 | 185.3  |
| 28H*(Z) | 8.74 | 2.707 | 1.401 | 1.722 | 156.09 | 4.79  | 35.28 | 5.37  | 40.65 | 0.7482 | 0.5233 | 0.1899 | 190.49 |
| 29H*(E) | 7.61 | 2.735 | 1.401 | 1.762 | 153.94 | 1.59  | 34.73 | 5.22  | 39.95 | 0.739  | 0.5485 | 0.1819 | 187.85 |
| 29H*(Z) | 7.53 | 2.739 | 1.402 | 1.766 | 154.18 | 3.42  | 33.4  | 3.29  | 36.69 | 0.7389 | 0.5627 | 0.1845 | 189.91 |
| 30H*(E) | 9.61 | 2.679 | 1.418 | 1.694 | 155.64 | 17.94 | 30.76 | 6.55  | 37.31 | 0.7328 | 0.5148 | 0.1834 | 182.41 |
| 30H*(Z) | 9.58 | 2.678 | 1.417 | 1.695 | 154.92 | 18.25 | 32.88 | 0.48  | 33.36 | 0.7447 | 0.6571 | 0.188  | 189.57 |
| 31H*(E) | 6.4  | 2.76  | 1.4   | 1.813 | 150.08 | 1.14  | 34.41 | 4.57  | 38.98 | 0.7299 | 0.6036 | 0.1864 | 186.83 |
| 31H*(Z) | 6.23 | 2.772 | 1.398 | 1.824 | 150.86 | 1.73  | 31.97 | 1.99  | 33.97 | 0.7289 | 0.63   | 0.187  | 190.06 |
| 32H*(E) | 4.57 | 2.822 | 1.566 | 1.912 | 145.35 | 2.61  | 53.65 | 43.94 | 97.58 | 0.7932 | 0.5708 | 0.2518 | 179.03 |
| 32H*(Z) | 5.21 | 2.804 | 1.584 | 1.874 | 148.03 | 1.31  | 50.43 | 22.98 | 73.4  | 0.7904 | 0.5981 | 0.2462 | 181.17 |
| 33H*(E) | 5.21 | 2.735 | 1.387 | 1.874 | 140.26 | 3.23  | 27.61 | 6.03  | 33.64 | 0.7234 | 0.5768 | 0.1792 | 184.14 |
| 33H*(Z) | 4.52 | 2.764 | 1.383 | 1.917 | 138.91 | 0.73  | 25.65 | 4.6   | 30.26 | 0.7286 | 0.6855 | 0.1783 | 188.01 |
| 34H*(E) | -    | 2.766 | 1.365 | 2.778 | 78.87  | 0.52  | 8.89  | 0.57  | 9.46  | 0.7078 | 0.5333 | 0.1668 | 180.79 |
| 34H*(Z) | -    | 2.773 | 1.366 | 2.562 | 91.2   | 0.74  | 12.09 | 0.82  | 12.91 | 0.721  | 0.6849 | 0.1686 | 182.72 |
| 35H*(E) | 4.87 | 2.741 | 1.396 | 1.895 | 138.22 | 1.06  | 30.26 | 3.18  | 33.44 | 0.7256 | 0.533  | 0.1845 | 186.48 |
| 35H*(Z) | 4.49 | 2.754 | 1.394 | 1.918 | 136.99 | 8.42  | 30.48 | 2.74  | 33.22 | 0.7208 | 0.6322 | 0.1808 | 188.3  |
| 36H*(E) | 5.02 | 2.729 | 1.398 | 1.888 | 137.6  | 1.06  | 25.6  | 3.64  | 29.24 | 0.7292 | 0.4754 | 0.1764 | 185.64 |
| 36H*(Z) | 4.58 | 2.74  | 1.396 | 1.915 | 135.85 | 11.9  | 26.38 | 5.88  | 32.26 | 0.7256 | 0.6256 | 0.1716 | 187.16 |
| 37H*(E) | -    | 2.751 | 1.382 | 2.38  | 100.5  | 61.29 | 15.42 | 4.68  | 20.11 | 0.718  | 0.6504 | 0.1731 | 180.66 |
| 37H*(Z) | -    | 2.746 | 1.386 | 2.367 | 100.97 | 61.47 | 18.61 | 1.62  | 20.24 | 0.7209 | 0.5781 | 0.1748 | 179.77 |
| 38H*(E) | 8.33 | 2.736 | 1.413 | 1.732 | 161.48 | 56.65 | 31.81 | 3.79  | 35.6  | 0.7366 | 0.6329 | 0.1913 | 186.64 |
| 38H*(Z) | 7.37 | 2.762 | 1.419 | 1.769 | 158.86 | 59.96 | 34.66 | 6.01  | 40.67 | 0.7379 | 0.5775 | 0.1908 | 184.82 |
| 39H*(E) | 7.22 | 2.816 | 1.406 | 1.776 | 175.36 | 0.52  | 37.55 | 4.12  | 41.67 | 0.729  | 0.511  | 0.1868 | 188.2  |
| 39H*(Z) | 7.13 | 2.822 | 1.408 | 1.78  | 176.16 | 5.31  | 38.32 | 3.99  | 42.31 | 0.7306 | 0.667  | 0.1878 | 190.84 |
| 40H*(E) | 5.06 | 2.806 | 1.406 | 1.888 | 147.1  | 2.9   | 15.9  | 9.48  | 25.38 | 0.7237 | 0.6976 | 0.1877 | 183.29 |
| 40H*(Z) | 5.12 | 2.811 | 1.407 | 1.884 | 148.01 | 9.44  | 29.75 | 7.1   | 36.85 | 0.7301 | 0.6704 | 0.1865 | 187.76 |
| 41H*(E) | 4.75 | 2.822 | 1.44  | 1.902 | 147.41 | 0.35  | 33.61 | 5.12  | 38.73 | 0.7437 | 0.6142 | 0.2007 | 184.03 |
| 41H*(Z) | 4.75 | 2.827 | 1.442 | 1.902 | 148.48 | 4.53  | 31.51 | 4.44  | 35.95 | 0.744  | 0.7037 | 0.2045 | 185.9  |

|         |      |       |       |       |        |       |       |       |       |        |        |        |        |
|---------|------|-------|-------|-------|--------|-------|-------|-------|-------|--------|--------|--------|--------|
| 42H*(E) | 6.2  | 2.691 | 1.4   | 1.773 | 146.43 | 6.03  | -     | -     | -     | 0.8405 | 0.76   | 0.2366 | 179.24 |
| 42H*(Z) | 6.4  | 2.688 | 1.398 | 1.765 | 147.43 | 2.55  | -     | -     | -     | 0.8432 | 0.8083 | 0.2419 | 178.62 |
| 43H*(E) | 8.17 | 2.694 | 1.408 | 1.74  | 150.29 | 18.98 | 34.81 | 10.81 | 45.62 | 0.7394 | 0.6534 | 0.1907 | 187.46 |
| 43H*(Z) | 7.78 | 2.702 | 1.409 | 1.757 | 149.09 | 22.18 | 31.12 | 5.12  | 36.24 | 0.7354 | 0.7038 | 0.189  | 189.38 |
| 44H*(E) | 2.37 | 2.785 | 1.388 | 2.149 | 118.01 | 0.6   | 25.13 | 2.66  | 27.79 | 0.7227 | 0.6019 | 0.1807 | 183.11 |
| 44H*(Z) | -    | 2.924 | 1.366 | 2.567 | 99.04  | 3.09  | 11    | 7.63  | 18.63 | 0.7369 | 0.6129 | 0.1955 | 186.99 |

\* colour chart should be considered within each column

**Table S6.** Geometric and electronic parameters of **9-44** in acetonitrile (PCM).

| Compd | $r_1$ , Å | $r_2$ , Å | $\omega$ , deg | $\chi_N$ , deg | $\tau$ , deg | $\delta$ , deg | $q_{NPA}$ | $q_{MK}$ | $q_H$  | $\delta$ , ppm |
|-------|-----------|-----------|----------------|----------------|--------------|----------------|-----------|----------|--------|----------------|
| 9(E)  | 2.793*    | 1.363     | 2.59           | 16.47          | 4.95         | 21.42          | 0.6819    | 0.4253   | 0.1621 | 178.62         |
| 9(Z)  | 2.808     | 1.36      | 15.7           | 7.8            | 7.04         | 14.84          | 0.6923    | 0.4162   | 0.1649 | 182            |
| 10(E) | 2.786     | 1.361     | 15.07          | 10.82          | 5            | 15.83          | 0.7103    | 0.6477   | 0.1652 | 179.92         |
| 10(Z) | 2.79      | 1.363     | 16.43          | 9.23           | 2.09         | 11.32          | 0.7151    | 0.6936   | 0.1699 | 181.45         |
| 11(E) | 2.758     | 1.358     | 2.45           | 12.38          | 4.95         | 17.33          | 0.7091    | 0.5924   | 0.1633 | 179.69         |
| 11(Z) | 2.76      | 1.36      | 6.55           | 11.38          | 2.59         | 13.97          | 0.7125    | 0.6407   | 0.1671 | 181.17         |
| 12(E) | 2.759     | 1.358     | 3.24           | 12.19          | 4.44         | 16.62          | 0.7098    | 0.592    | 0.1641 | 179.54         |
| 12(Z) | 2.761     | 1.361     | 3.03           | 11.97          | 2.79         | 14.76          | 0.7133    | 0.6152   | 0.1678 | 181.44         |
| 13(E) | 2.79      | 1.364     | 10.19          | 14.82          | 6.34         | 21.16          | 0.7123    | 0.5922   | 0.1675 | 180.64         |
| 13(Z) | 2.787     | 1.367     | 14.13          | 14.2           | 3.27         | 17.48          | 0.7162    | 0.6578   | 0.1716 | 181.79         |
| 14(E) | 2.826     | 1.368     | 27.96          | 12.22          | 5.61         | 17.83          | 0.713     | 0.6406   | 0.1694 | 180.82         |
| 14(Z) | 2.824     | 1.371     | 28.94          | 11.03          | 2.65         | 13.68          | 0.7183    | 0.6987   | 0.1741 | 181.75         |
| 15(E) | 2.77      | 1.36      | 15.77          | 9.99           | 4.97         | 14.96          | 0.7097    | 0.6166   | 0.1648 | 179.79         |
| 15(Z) | 2.777     | 1.363     | 17.91          | 8.11           | 2            | 10.11          | 0.715     | 0.6858   | 0.17   | 181.29         |
| 16(E) | 2.772     | 1.368     | 20.49          | 11.21          | 5.71         | 16.92          | 0.7135    | 0.6262   | 0.1704 | 179.98         |
| 16(Z) | 2.773     | 1.37      | 21.9           | 9.57           | 2.67         | 12.24          | 0.7188    | 0.6645   | 0.1754 | 181.62         |
| 17(E) | 2.777     | 1.36      | 17.66          | 10.43          | 4.54         | 14.97          | 0.7094    | 0.5936   | 0.1638 | 180.12         |
| 17(Z) | 2.781     | 1.362     | 18.68          | 9.07           | 1.94         | 11             | 0.7142    | 0.6462   | 0.1686 | 181.1          |
| 18(E) | 2.758     | 1.359     | 12.25          | 8.24           | 4.19         | 12.43          | 0.7143    | 0.5569   | 0.165  | 180.54         |
| 18(Z) | 2.77      | 1.361     | 15.36          | 6.63           | 2.83         | 9.46           | 0.7213    | 0.5529   | 0.1721 | 179.99         |
| 19(E) | 2.761     | 1.363     | 10.29          | 8.35           | 3.88         | 12.24          | 0.7213    | 0.572    | 0.1598 | 180.33         |
| 19(Z) | 2.769     | 1.365     | 11.81          | 8.05           | 3.54         | 11.6           | 0.7271    | 0.6806   | 0.1639 | 181.25         |
| 20(E) | 2.77      | 1.367     | 15.54          | 10.2           | 3.93         | 14.13          | 0.7179    | 0.6062   | 0.1629 | 179.5          |
| 20(Z) | 2.768     | 1.368     | 17.94          | 11.66          | 0.31         | 11.97          | 0.7272    | 0.6402   | 0.168  | 182.47         |
| 21(E) | 2.736     | 1.36      | 21.68          | 9.79           | 4.72         | 14.51          | 0.7091    | 0.6626   | 0.1644 | 179.73         |
| 21(Z) | 2.741     | 1.364     | 22.89          | 8.03           | 1.61         | 9.64           | 0.7147    | 0.6986   | 0.1698 | 180.79         |
| 22(E) | 2.848     | 1.377     | 29.72          | 10.99          | 6.53         | 17.52          | 0.7166    | 0.6559   | 0.1752 | 180.98         |
| 22(Z) | 2.846     | 1.379     | 20.59          | 9.27           | 3.37         | 12.64          | 0.7227    | 0.6821   | 0.18   | 182.25         |
| 23(E) | 2.756     | 1.358     | 20.59          | 8.77           | 4.4          | 13.17          | 0.7081    | 0.6631   | 0.1624 | 180.08         |
| 23(Z) | 2.762     | 1.362     | 22.16          | 6.89           | 1.79         | 8.68           | 0.7137    | 0.6901   | 0.168  | 180.96         |
| 24(E) | 2.741     | 1.357     | 2.57           | 10.62          | 5.04         | 15.66          | 0.713     | 0.5623   | 0.1639 | 180.21         |
| 24(Z) | 2.746     | 1.358     | 3.78           | 9.44           | 3.3          | 12.74          | 0.7183    | 0.5794   | 0.1695 | 180.21         |
| 25(E) | 2.744     | 1.362     | 11.51          | 9.14           | 3.18         | 12.32          | 0.718     | 0.5201   | 0.1604 | 179.51         |
| 25(Z) | 2.746     | 1.362     | 5.85           | 9.77           | 3.64         | 13.41          | 0.7223    | 0.6292   | 0.1625 | 181.68         |
| 26(E) | 2.777     | 1.371     | 10.05          | 12.94          | 5.16         | 18.1           | 0.7176    | 0.5568   | 0.164  | 180.01         |
| 26(Z) | 2.765     | 1.371     | 14.89          | 15.41          | 1.26         | 16.66          | 0.7273    | 0.6376   | 0.1685 | 182.95         |
| 27(E) | 2.794     | 1.369     | 6.91           | 12.3           | 5.38         | 17.68          | 0.7137    | 0.5653   | 0.1679 | 181.48         |
| 27(Z) | 2.788     | 1.369     | 14.43          | 11.48          | 1.64         | 13.12          | 0.7188    | 0.6211   | 0.172  | 183.7          |
| 28(E) | 2.82      | 1.364     | 6.99           | 2.85           | 7.43         | 10.28          | 0.7355    | 0.5869   | 0.1685 | 181.87         |
| 28(Z) | 2.783     | 1.356     | 8.95           | 5.84           | 2.95         | 8.79           | 0.7344    | 0.5236   | 0.1695 | 183.07         |
| 29(E) | 2.752     | 1.354     | 6.38           | 10.29          | 2.98         | 13.27          | 0.7154    | 0.5932   | 0.16   | 180.41         |
| 29(Z) | 2.754     | 1.356     | 5.33           | 7.95           | 2.04         | 9.98           | 0.7183    | 0.6201   | 0.1628 | 181.08         |
| 30(E) | 2.776     | 1.377     | 1.22           | 15.06          | 4.59         | 19.65          | 0.7192    | 0.5604   | 0.1659 | 180.36         |
| 30(Z) | 2.767     | 1.377     | 25.33          | 17.17          | 0.97         | 18.14          | 0.7306    | 0.6435   | 0.1714 | 183.52         |
| 31(E) | 2.788     | 1.361     | 16.31          | 12.09          | 5.17         | 17.27          | 0.7095    | 0.6192   | 0.1674 | 180.01         |
| 31(Z) | 2.823     | 1.371     | 19.84          | 11.83          | 7.28         | 19.11          | 0.734     | 0.6667   | 0.1678 | 180.73         |
| 32(E) | 2.83      | 1.367     | 8.65           | 19.18          | 4.04         | 23.22          | 0.7131    | 0.5764   | 0.1611 | 181.66         |
| 32(Z) | 2.845     | 1.367     | 0.92           | 18.97          | 0.05         | 19.02          | 0.717     | 0.5986   | 0.1616 | 183.69         |
| 33(E) | 2.736     | 1.357     | 11.94          | 8.37           | 1.05         | 9.42           | 0.7332    | 0.6163   | 0.1668 | 181.4          |

|       |       |       |       |       |      |       |        |        |        |        |
|-------|-------|-------|-------|-------|------|-------|--------|--------|--------|--------|
| 33(Z) | 2.738 | 1.357 | 18.64 | 1.65  | 5.64 | 7.29  | 0.7221 | 0.7065 | 0.1649 | 181.89 |
| 34(E) | 2.749 | 1.359 | 3.18  | 6.69  | 0.88 | 7.57  | 0.7334 | 0.6072 | 0.1649 | 182.17 |
| 34(Z) | 2.76  | 1.36  | 9.37  | 11.52 | 1.84 | 13.36 | 0.7257 | 0.6242 | 0.1645 | 181.55 |
| 35(E) | 2.774 | 1.361 | 1.1   | 2.88  | 3.55 | 6.43  | 0.7251 | 0.5543 | 0.1701 | 180.49 |
| 35(Z) | 2.775 | 1.361 | 17.88 | 7.33  | 4.18 | 11.52 | 0.7254 | 0.6627 | 0.1654 | 182.75 |
| 36(E) | 2.748 | 1.363 | 5.24  | 4.58  | 1.37 | 5.95  | 0.732  | 0.5295 | 0.1676 | 180.33 |
| 36(Z) | 2.755 | 1.362 | 17.78 | 6.93  | 4.12 | 11.05 | 0.7376 | 0.7362 | 0.1626 | 182.94 |
| 37(E) | 2.692 | 1.365 | 61.48 | 7.45  | 3.48 | 10.92 | 0.7121 | 0.6799 | 0.1637 | 178.22 |
| 37(Z) | 2.676 | 1.367 | 61.26 | 7.99  | 4.26 | 12.25 | 0.7148 | 0.6897 | 0.1643 | 177.78 |
| 38(E) | 2.789 | 1.365 | 64.13 | 6.78  | 4.14 | 10.93 | 0.7152 | 0.6516 | 0.1658 | 178.74 |
| 38(Z) | 2.788 | 1.367 | 63.93 | 10.08 | 3.98 | 14.06 | 0.7158 | 0.6456 | 0.1655 | 178.25 |
| 39(E) | 2.936 | 1.37  | 24.09 | 11.21 | 4.09 | 15.3  | 0.7339 | 0.5867 | 0.1701 | 182.14 |
| 39(Z) | 2.93  | 1.375 | 28.66 | 12.6  | 5.42 | 18.02 | 0.7358 | 0.6222 | 0.169  | 177.94 |
| 40(E) | 2.807 | 1.382 | 16.6  | 12.08 | 9.51 | 21.59 | 0.7246 | 0.7172 | 0.1767 | 180.21 |
| 40(Z) | 2.834 | 1.379 | 22.65 | 11.36 | 9.2  | 20.57 | 0.7264 | 0.7547 | 0.1795 | 181.67 |
| 41(E) | 2.808 | 1.404 | 12.26 | 11.94 | 3.05 | 14.99 | 0.7511 | 0.6099 | 0.1867 | 182.62 |
| 41(Z) | 2.78  | 1.411 | 13.06 | 10.91 | 8.47 | 19.38 | 0.7562 | 0.6724 | 0.1897 | 179.96 |
| 42(E) | 2.739 | 1.37  | 4.71  | -     | -    | -     | 0.8613 | 0.7481 | 0.2168 | 179.57 |
| 42(Z) | 2.729 | 1.367 | 10.45 | -     | -    | -     | 0.8584 | 0.7776 | 0.2182 | 179.93 |
| 43(E) | 2.799 | 1.367 | 32.3  | 17.35 | 5.42 | 22.76 | 0.7203 | 0.7357 | 0.1687 | 181.26 |
| 43(Z) | 2.808 | 1.367 | 33.23 | 13.5  | 4.66 | 18.16 | 0.7179 | 0.7565 | 0.1658 | 180.87 |
| 44(E) | 2.893 | 1.366 | 0.73  | 8.94  | 0.93 | 9.87  | 0.7171 | 0.5628 | 0.1678 | 181.05 |
| 44(Z) | 2.849 | 1.365 | 3.52  | 7.68  | 3.72 | 11.4  | 0.7101 | 0.6752 | 0.1687 | 182.24 |

\* colour chart should be considered within each column

**Table S7.** Change of geometric and electronic parameters during transition from **9-44** to cations **9H<sup>+</sup>-44H<sup>+</sup>** in acetonitrile (PCM).

| Compd                | $\Delta r_1$ , Å | $\Delta r_2$ , Å | $\Delta \omega$ , deg | $\Delta \chi_N$ , deg | $\Delta \tau$ , deg | $\Delta \vartheta$ , deg | $\Delta q_{NPA}$ | $\Delta q_{MK}$ | $\Delta q_H$ | $\Delta \delta$ , ppm |
|----------------------|------------------|------------------|-----------------------|-----------------------|---------------------|--------------------------|------------------|-----------------|--------------|-----------------------|
| 9H <sup>+</sup> (E)  | -0.036*          | 0.042            | 0.81                  | 22.61                 | 5.23                | 27.85                    | 0.0233           | 0.0309          | 0.0185       | 5.86                  |
| 9H <sup>+</sup> (Z)  | -0.016           | 0.032            | -12.26                | 16.62                 | 2.6                 | 19.22                    | 0.0123           | -0.0057         | 0.0134       | 5.11                  |
| 10H <sup>+</sup> (E) | -0.023           | 0.04             | -14.07                | 23.83                 | -0.05               | 23.78                    | 0.0201           | -0.0694         | 0.0214       | 6.88                  |
| 10H <sup>+</sup> (Z) | -0.021           | 0.035            | -16.15                | 22.28                 | -0.01               | 22.27                    | 0.0139           | -0.0695         | 0.0172       | 8.43                  |
| 11H <sup>+</sup> (E) | -0.042           | 0.047            | -1.35                 | 23.68                 | 1.31                | 24.98                    | 0.0219           | -0.0153         | 0.024        | 7.11                  |
| 11H <sup>+</sup> (Z) | -0.038           | 0.043            | -2.33                 | 22.03                 | -0.8                | 21.23                    | 0.0209           | -0.0042         | 0.0225       | 9.34                  |
| 12H <sup>+</sup> (E) | -0.048           | 0.048            | -2.64                 | 24.28                 | 1.82                | 26.1                     | 0.022            | -0.0288         | 0.0243       | 7.15                  |
| 12H <sup>+</sup> (Z) | -0.047           | 0.045            | -0.04                 | 21.2                  | -1.5                | 19.7                     | 0.0205           | 0.0295          | 0.0226       | 9.01                  |
| 13H <sup>+</sup> (E) | -0.088           | 0.045            | -1.37                 | 22.07                 | -0.9                | 21.17                    | 0.0197           | -0.006          | 0.022        | 5.95                  |
| 13H <sup>+</sup> (Z) | -0.08            | 0.041            | -6.13                 | 20.68                 | -3.27               | 17.42                    | 0.0202           | -0.0083         | 0.021        | 9.34                  |
| 14H <sup>+</sup> (E) | -0.089           | 0.038            | -26.6                 | 24.33                 | -0.66               | 23.67                    | 0.0199           | -0.059          | 0.0204       | 5.95                  |
| 14H <sup>+</sup> (Z) | -0.086           | 0.033            | -26.5                 | 22.13                 | -0.57               | 21.56                    | 0.0138           | -0.0882         | 0.0162       | 8.85                  |
| 15H <sup>+</sup> (E) | -0.026           | 0.039            | -12.49                | 24.32                 | 2.31                | 26.64                    | 0.0185           | -0.0376         | 0.0202       | 6.57                  |
| 15H <sup>+</sup> (Z) | -0.016           | 0.035            | -14.69                | 24.3                  | 0.26                | 24.56                    | 0.0142           | -0.05           | 0.017        | 8.66                  |
| 16H <sup>+</sup> (E) | -0.029           | 0.04             | -17.82                | 25.47                 | 0.17                | 25.64                    | 0.0192           | -0.0209         | 0.0203       | 6.11                  |
| 16H <sup>+</sup> (Z) | -0.027           | 0.033            | -18.46                | 23.75                 | -1.18               | 22.57                    | 0.0128           | -0.0474         | 0.0156       | 8.66                  |
| 17H <sup>+</sup> (E) | -0.023           | 0.04             | -14.61                | 24.18                 | 0.85                | 25.03                    | 0.021            | -0.0086         | 0.0219       | 7.27                  |
| 17H <sup>+</sup> (Z) | -0.024           | 0.036            | -14.2                 | 22.28                 | -0.31               | 21.97                    | 0.014            | -0.0165         | 0.0175       | 8.9                   |
| 18H <sup>+</sup> (E) | -0.013           | 0.039            | -11.62                | 21.96                 | 0.73                | 22.68                    | 0.0089           | -0.0353         | 0.0165       | 5.82                  |
| 18H <sup>+</sup> (Z) | -0.017           | 0.035            | -11.77                | 20.54                 | -1.09               | 19.45                    | 0.0025           | -0.019          | 0.0114       | 8.35                  |
| 19H <sup>+</sup> (E) | -0.014           | 0.04             | -6.79                 | 21.14                 | 1.92                | 23.07                    | 0.0097           | -0.0702         | 0.0161       | 4.49                  |
| 19H <sup>+</sup> (Z) | -0.01            | 0.037            | -5.25                 | 20.89                 | 0.98                | 21.87                    | 0.0074           | -0.0481         | 0.0152       | 7.59                  |
| 20H <sup>+</sup> (E) | -0.005           | 0.036            | -7.51                 | 17.52                 | 1.24                | 18.75                    | 0.0108           | -0.062          | 0.0156       | 3.62                  |
| 20H <sup>+</sup> (Z) | -0.027           | 0.038            | -4.45                 | 18.84                 | 0.85                | 19.69                    | 0.0113           | -0.027          | 0.0144       | 5.15                  |
| 21H <sup>+</sup> (E) | -0.039           | 0.042            | -21.29                | 25.54                 | 1.77                | 27.32                    | 0.0205           | -0.119          | 0.0217       | 6.94                  |
| 21H <sup>+</sup> (Z) | -0.034           | 0.037            | -20.16                | 24.59                 | 0.57                | 25.16                    | 0.0159           | -0.073          | 0.0184       | 9.03                  |
| 22H <sup>+</sup> (E) | -0.13            | 0.037            | -27.12                | 26.14                 | -0.84               | 25.3                     | 0.0164           | -0.089          | 0.0169       | 4.22                  |
| 22H <sup>+</sup> (Z) | -0.115           | 0.03             | -14.8                 | 24.43                 | -0.57               | 23.86                    | 0.0118           | -0.0122         | 0.0137       | 8.5                   |
| 23H <sup>+</sup> (E) | -0.011           | 0.038            | -8.92                 | 24.57                 | 3.96                | 28.53                    | 0.0186           | -0.0689         | 0.0201       | 6.95                  |
| 23H <sup>+</sup> (Z) | -0.008           | 0.034            | -9.02                 | 24.72                 | 1.5                 | 26.22                    | 0.0145           | -0.0629         | 0.0172       | 8.72                  |
| 24H <sup>+</sup> (E) | -0.04            | 0.044            | 1.71                  | 19.48                 | -0.31               | 19.17                    | 0.0122           | -0.0234         | 0.0193       | 6.5                   |
| 24H <sup>+</sup> (Z) | -0.04            | 0.042            | 6.78                  | 18.65                 | -0.19               | 18.45                    | 0.0149           | 0.052           | 0.0191       | 7.37                  |

|                      |        |       |        |       |       |       |         |         |        |       |
|----------------------|--------|-------|--------|-------|-------|-------|---------|---------|--------|-------|
| 25H <sup>+</sup> (E) | -0.044 | 0.047 | -11.19 | 21.3  | 1.52  | 22.82 | 0.0161  | -0.0505 | 0.0183 | 5.79  |
| 25H <sup>+</sup> (Z) | -0.04  | 0.046 | -1.12  | 20.23 | 0.84  | 21.07 | 0.0159  | 0.0349  | 0.0191 | 7.53  |
| 26H <sup>+</sup> (E) | -0.082 | 0.042 | 4.95   | 16.56 | 0.06  | 16.62 | 0.0148  | -0.0477 | 0.0174 | 2.41  |
| 26H <sup>+</sup> (Z) | -0.058 | 0.044 | -8.68  | 15.93 | 2.77  | 18.7  | 0.0315  | 0.0356  | 0.0182 | 8.24  |
| 27H <sup>+</sup> (E) | -0.084 | 0.042 | -5.2   | 18.69 | -1.4  | 17.29 | 0.0106  | -0.0528 | 0.0178 | 4.22  |
| 27H <sup>+</sup> (Z) | -0.075 | 0.039 | -8.73  | 18.03 | -0.3  | 17.73 | 0.0081  | -0.0231 | 0.0158 | 6.45  |
| 28H <sup>+</sup> (E) | -0.07  | 0.029 | 3.11   | 17.45 | -4.2  | 13.24 | -0.0117 | -0.143  | 0.0094 | 3.43  |
| 28H <sup>+</sup> (Z) | -0.076 | 0.045 | -4.17  | 29.44 | 2.42  | 31.86 | 0.0139  | -0.0004 | 0.0203 | 7.41  |
| 29H <sup>+</sup> (E) | -0.017 | 0.047 | -4.79  | 24.44 | 2.24  | 26.68 | 0.0236  | -0.0447 | 0.0218 | 7.44  |
| 29H <sup>+</sup> (Z) | -0.015 | 0.046 | -1.92  | 25.45 | 1.25  | 26.7  | 0.0206  | -0.0574 | 0.0218 | 8.83  |
| 30H <sup>+</sup> (E) | -0.186 | 0.041 | 16.72  | 15.7  | 1.96  | 17.66 | 0.0136  | -0.0456 | 0.0175 | 2.05  |
| 30H <sup>+</sup> (Z) | -0.089 | 0.04  | -7.08  | 15.7  | -0.49 | 15.22 | 0.0141  | 0.0136  | 0.0167 | 6.05  |
| 31H <sup>+</sup> (E) | -0.028 | 0.039 | -15.18 | 22.32 | -0.61 | 21.71 | 0.0203  | -0.0156 | 0.019  | 6.81  |
| 31H <sup>+</sup> (Z) | -0.051 | 0.027 | -18.11 | 20.14 | -5.28 | 14.86 | -0.0051 | -0.0367 | 0.0192 | 9.34  |
| 32H <sup>+</sup> (E) | -0.009 | 0.199 | -6.04  | 34.46 | 39.9  | 74.36 | 0.0801  | -0.0056 | 0.0907 | -2.63 |
| 32H <sup>+</sup> (Z) | -0.041 | 0.216 | 0.38   | 31.46 | 22.93 | 54.39 | 0.0735  | -0.0005 | 0.0846 | -2.52 |
| 33H <sup>+</sup> (E) | -0.001 | 0.03  | -8.71  | 19.24 | 4.98  | 24.22 | -0.0097 | -0.0395 | 0.0124 | 2.74  |
| 33H <sup>+</sup> (Z) | 0.026  | 0.027 | -17.91 | 24    | -1.04 | 22.96 | 0.0064  | -0.021  | 0.0135 | 6.12  |
| 34H <sup>+</sup> (E) | 0.017  | 0.006 | -2.66  | 2.2   | -0.31 | 1.89  | -0.0256 | -0.0738 | 0.0019 | -1.39 |
| 34H <sup>+</sup> (Z) | 0.014  | 0.007 | -8.62  | 0.58  | -1.02 | -0.44 | -0.0047 | 0.0607  | 0.0042 | 1.17  |
| 35H <sup>+</sup> (E) | -0.033 | 0.035 | -0.04  | 27.38 | -0.36 | 27.01 | 0.0006  | -0.0213 | 0.0144 | 6     |
| 35H <sup>+</sup> (Z) | -0.021 | 0.034 | -9.46  | 23.15 | -1.44 | 21.7  | -0.0046 | -0.0305 | 0.0154 | 5.55  |
| 36H <sup>+</sup> (E) | -0.02  | 0.034 | -4.18  | 21.03 | 2.27  | 23.3  | -0.0028 | -0.0541 | 0.0088 | 5.31  |
| 36H <sup>+</sup> (Z) | -0.015 | 0.034 | -5.88  | 19.45 | 1.76  | 21.21 | -0.0119 | -0.1106 | 0.009  | 4.23  |
| 37H <sup>+</sup> (E) | 0.059  | 0.017 | -0.19  | 7.97  | 1.21  | 9.18  | 0.0059  | -0.0295 | 0.0094 | 2.45  |
| 37H <sup>+</sup> (Z) | 0.07   | 0.02  | 0.21   | 10.62 | -2.64 | 7.98  | 0.006   | -0.1116 | 0.0106 | 1.98  |
| 38H <sup>+</sup> (E) | -0.053 | 0.048 | -7.48  | 25.03 | -0.35 | 24.68 | 0.0215  | -0.0187 | 0.0254 | 7.9   |
| 38H <sup>+</sup> (Z) | -0.026 | 0.051 | -3.97  | 24.58 | 2.03  | 26.61 | 0.0221  | -0.0681 | 0.0252 | 6.57  |
| 39H <sup>+</sup> (E) | -0.12  | 0.035 | -23.57 | 26.34 | 0.04  | 26.37 | -0.0049 | -0.0756 | 0.0167 | 6.06  |
| 39H <sup>+</sup> (Z) | -0.108 | 0.033 | -23.35 | 25.72 | -1.43 | 24.29 | -0.0052 | 0.0448  | 0.0188 | 12.91 |
| 40H <sup>+</sup> (E) | -0.002 | 0.024 | -13.71 | 3.82  | -0.03 | 3.79  | -0.0009 | -0.0196 | 0.011  | 3.08  |
| 40H <sup>+</sup> (Z) | -0.022 | 0.028 | -13.2  | 18.39 | -2.11 | 16.28 | 0.0037  | -0.0843 | 0.007  | 6.09  |
| 41H <sup>+</sup> (E) | 0.014  | 0.036 | -11.91 | 21.68 | 2.07  | 23.74 | -0.0074 | 0.0043  | 0.014  | 1.41  |
| 41H <sup>+</sup> (Z) | 0.047  | 0.031 | -8.54  | 20.6  | -4.03 | 16.57 | -0.0122 | 0.0313  | 0.0148 | 5.93  |
| 42H <sup>+</sup> (E) | -0.048 | 0.03  | 1.32   | -     | -     | -     | -0.0208 | 0.0119  | 0.0198 | -0.33 |
| 42H <sup>+</sup> (Z) | -0.041 | 0.032 | -7.9   | -     | -     | -     | -0.0153 | 0.0307  | 0.0237 | -1.31 |
| 43H <sup>+</sup> (E) | -0.105 | 0.041 | -13.32 | 17.46 | 5.39  | 22.86 | 0.0191  | -0.0823 | 0.022  | 6.19  |
| 43H <sup>+</sup> (Z) | -0.106 | 0.042 | -11.04 | 17.62 | 0.46  | 18.09 | 0.0175  | -0.0527 | 0.0232 | 8.52  |
| 44H <sup>+</sup> (E) | -0.108 | 0.022 | -0.13  | 16.19 | 1.73  | 17.92 | 0.0056  | 0.0391  | 0.0129 | 2.07  |
| 44H <sup>+</sup> (Z) | 0.074  | 0.001 | -0.43  | 3.31  | 3.92  | 7.23  | 0.0268  | -0.0623 | 0.0268 | 4.75  |

\* colour chart should be considered within each column

**Table S8.** Change of geometric and electronic parameters in cations 9H<sup>+</sup>-44H<sup>+</sup> during transition from vacuum to acetonitrile (PCM).

| Compd                | $\Delta'E_{HB}$ , kcal·mol <sup>-1</sup> | $\Delta'r_1$ , Å | $\Delta'r_2$ , Å | $\Delta'r_3$ , Å | $\Delta'\alpha$ , deg | $\Delta'\omega$ , deg | $\Delta'\chi_N$ , deg | $\Delta'\tau$ , deg | $\Delta'\vartheta$ , deg | $\Delta'q_{NPA}$ | $\Delta'q_{MK}$ | $\Delta'q_H$ | $\Delta'\delta$ , ppm |
|----------------------|------------------------------------------|------------------|------------------|------------------|-----------------------|-----------------------|-----------------------|---------------------|--------------------------|------------------|-----------------|--------------|-----------------------|
| 9H <sup>+</sup> (E)  | -3.05*                                   | 0.071            | -0.026           | 0.117            | -4.51                 | -1.92                 | -3.21                 | -2.62               | -5.82                    | 0.0121           | 0.0769          | 0.003        | 5.58                  |
| 9H <sup>+</sup> (Z)  | -1.25                                    | 0.029            | -0.021           | 0.054            | -3.08                 | -2.47                 | -1.12                 | -9.45               | -10.57                   | 0.0065           | -0.2018         | 0.001        | 1.72                  |
| 10H <sup>+</sup> (E) | -2.8                                     | 0.066            | -0.022           | 0.107            | -6.45                 | 0.46                  | -1.01                 | 2.87                | 1.87                     | 0.0181           | 0.0898          | 0.003        | 6.01                  |
| 10H <sup>+</sup> (Z) | -0.99                                    | 0.017            | -0.018           | 0.042            | -3.15                 | -4.18                 | -3.61                 | -7.53               | -11.14                   | 0.0115           | -0.0267         | 0.001        | 2.64                  |
| 11H <sup>+</sup> (E) | -2.47                                    | 0.051            | -0.022           | 0.076            | -2.25                 | -3.94                 | -0.18                 | 4.08                | 3.9                      | 0.016            | 0.0733          | 0.0019       | 5.35                  |
| 11H <sup>+</sup> (Z) | -0.98                                    | 0.014            | -0.017           | 0.033            | -2.53                 | -4.76                 | -2.8                  | -6.74               | -9.54                    | 0.0137           | -0.0067         | 0.0022       | 3.22                  |
| 12H <sup>+</sup> (E) | -2.19                                    | 0.045            | -0.02            | 0.067            | -1.9                  | -0.34                 | -0.17                 | 3.71                | 3.53                     | 0.0168           | 0.0782          | 0.0025       | 5.78                  |
| 12H <sup>+</sup> (Z) | -0.69                                    | 0.008            | -0.016           | 0.021            | -1.88                 | 0.13                  | -2.65                 | -7.27               | -9.93                    | 0.014            | 0.0016          | 0.0024       | 3.45                  |
| 13H <sup>+</sup> (E) | -1.95                                    | 0.039            | -0.02            | 0.057            | -1.78                 | -0.12                 | -0.26                 | 2.52                | 2.26                     | 0.017            | 0.0584          | 0.0027       | 6.31                  |
| 13H <sup>+</sup> (Z) | -0.65                                    | 0.006            | -0.017           | 0.02             | -2                    | -4.91                 | -2.58                 | -5.55               | -8.14                    | 0.016            | -0.007          | 0.0038       | 4.13                  |
| 14H <sup>+</sup> (E) | -2.93                                    | 0.061            | -0.023           | -0.643           | -4.65                 | 1.16                  | -0.26                 | 2.67                | 2.41                     | 0.0193           | 0.0805          | 0.0043       | 6.14                  |
| 14H <sup>+</sup> (Z) | -0.89                                    | 0.01             | -0.018           | 0.034            | -3.17                 | -2.31                 | -2.85                 | -8.13               | -10.98                   | 0.0124           | -0.0712         | 0.0021       | 2.7                   |
| 15H <sup>+</sup> (E) | -2.17                                    | 0.05             | -0.02            | 0.081            | -3.26                 | 1.71                  | -1.37                 | 3.87                | 2.5                      | 0.0166           | 0.0527          | 0.0025       | 5.42                  |
| 15H <sup>+</sup> (Z) | -1                                       | 0.017            | -0.017           | 0.042            | -3.26                 | -6.98                 | -2.96                 | -7.06               | -10.02                   | 0.0133           | -0.0238         | 0.0021       | 2.98                  |

|         |       |        |        |        |        |        |        |        |        |        |         |          |       |
|---------|-------|--------|--------|--------|--------|--------|--------|--------|--------|--------|---------|----------|-------|
| 16H*(E) | -2.73 | 0.06   | -0.02  | 0.089  | -4.24  | 2.6    | -0.07  | 3.25   | 3.18   | 0.0198 | 0.0928  | 0.005    | 6.13  |
| 16H*(Z) | -0.85 | 0.01   | -0.017 | 0.033  | -2.84  | -2.07  | -2.74  | -7.69  | -10.42 | 0.013  | -0.0133 | 0.0029   | 2.95  |
| 17H*(E) | -2.94 | 0.066  | -0.022 | 0.109  | -4.84  | 0.83   | -0.81  | 2.72   | 1.91   | 0.0178 | 0.088   | 0.0031   | 5.74  |
| 17H*(Z) | -1.02 | 0.019  | -0.018 | 0.04   | -2.62  | -3     | -3.25  | -8.33  | -11.58 | 0.0109 | -0.0029 | 0.0011   | 2.75  |
| 18H*(E) | -2.31 | 0.055  | -0.019 | 0.086  | -3.08  | -0.33  | -0.94  | 3.05   | 2.12   | 0.0141 | 0.043   | 0.0008   | 5.27  |
| 18H*(Z) | -1.08 | 0.021  | -0.016 | 0.043  | -2.5   | -7.1   | -4.14  | -6.81  | -10.95 | 0.012  | -0.0496 | 0.0011   | 2.72  |
| 19H*(E) | -2.52 | 0.058  | -0.021 | 0.094  | -3.53  | 1.78   | -0.84  | 5.1    | 4.26   | 0.0131 | 0.045   | -0.0017  | 5.35  |
| 19H*(Z) | -1.6  | 0.035  | -0.019 | 0.064  | -3.22  | -5.78  | -3.61  | -6.83  | -10.44 | 0.0084 | -0.0378 | -0.0006  | 2.44  |
| 20H*(E) | -3.3  | 0.082  | -0.021 | 0.128  | -5.07  | -1.63  | 0.4    | 3.03   | 3.43   | 0.0126 | 0.045   | -0.0019  | 5.7   |
| 20H*(Z) | -2.09 | 0.047  | -0.018 | 0.078  | -2.79  | -4.62  | -3.18  | -5.92  | -9.1   | 0.0057 | -0.0504 | -0.0004  | 0.87  |
| 21H*(E) | -2.33 | 0.045  | -0.022 | 0.074  | -2.76  | -2.97  | -0.99  | 4.14   | 3.16   | 0.0158 | 0.0576  | 0.0017   | 5.33  |
| 21H*(Z) | -0.72 | 0.006  | -0.017 | 0.025  | -1.98  | -9.77  | -3.53  | -7.7   | -11.24 | 0.0129 | -0.0256 | 0.002    | 2.7   |
| 22H*(E) | -2.51 | 0.05   | -0.019 | 0.085  | -3.7   | -0.68  | 0.12   | 4.24   | 4.36   | 0.019  | 0.0513  | 0.0048   | 5.3   |
| 22H*(Z) | -0.83 | 0.006  | -0.017 | 0.031  | -3.29  | 3.63   | -2.33  | -7.26  | -9.58  | 0.0131 | 0.0438  | 0.0033   | 3.08  |
| 23H*(E) | -2.58 | 0.059  | -0.021 | 0.096  | -4.11  | 4.35   | -1.91  | 3.78   | 1.86   | 0.0154 | 0.0641  | 0.0016   | 5.23  |
| 23H*(Z) | -1.08 | 0.02   | -0.017 | 0.044  | -2.98  | -3.55  | -2.71  | -6.61  | -9.32  | 0.0133 | -0.0413 | 0.002    | 2.89  |
| 24H*(E) | -2.21 | 0.043  | -0.019 | 0.067  | -2.09  | -0.08  | -0.98  | 2.8    | 1.82   | 0.0141 | 0.0421  | 0.001    | 4.86  |
| 24H*(Z) | -0.87 | 0.014  | -0.015 | 0.028  | -1.39  | -6.78  | -3.34  | -6.34  | -9.68  | 0.0125 | 0.0116  | 0.0027   | 2.85  |
| 25H*(E) | -2.22 | 0.044  | -0.019 | 0.065  | -1.8   | -1.05  | -0.72  | 3.51   | 2.79   | 0.0131 | 0.0178  | -0.0009  | 5.61  |
| 25H*(Z) | -1.15 | 0.02   | -0.017 | 0.036  | -1.55  | -5.43  | -2.62  | -6.35  | -8.97  | 0.0104 | -0.0368 | 0.0004   | 3.05  |
| 26H*(E) | -2.24 | 0.043  | -0.02  | 0.066  | -2.15  | 0.08   | 0.54   | 3      | 3.54   | 0.0116 | 0.0082  | -0.0024  | 5.41  |
| 26H*(Z) | -1.44 | 0.022  | -0.021 | 0.045  | -2.88  | -3.04  | -3.77  | -4.27  | -8.04  | 0.0052 | -0.0207 | -0.0016  | 3.49  |
| 27H*(E) | -2.53 | 0.051  | -0.017 | 0.077  | -2.52  | -1.03  | -0.38  | 2.69   | 2.32   | 0.0147 | 0.0485  | 0.0027   | 5.14  |
| 27H*(Z) | -1.08 | 0.018  | -0.013 | 0.034  | -2.06  | -3.76  | -2.59  | -6.35  | -8.94  | 0.0134 | -0.0351 | 0.0034   | 3.73  |
| 28H*(E) | -1.42 | 0.036  | -0.016 | 0.053  | -1.91  | 1.79   | 1.39   | 2.31   | 3.7    | 0.0128 | -0.0249 | -0.0004  | 4.87  |
| 28H*(Z) | -0.96 | 0.016  | -0.016 | 0.031  | -1.43  | -5.46  | -3.98  | -6.84  | -10.82 | 0.0054 | -0.0009 | 0.0003   | 2.02  |
| 29H*(E) | -2.19 | 0.049  | -0.021 | 0.075  | -2.46  | 0.17   | -0.99  | 3.91   | 2.92   | 0.0145 | 0.0686  | -0.0014  | 6.16  |
| 29H*(Z) | -1.17 | 0.023  | -0.018 | 0.042  | -2.14  | -4.11  | -3.34  | -7.54  | -10.88 | 0.0079 | -0.0347 | -0.0011  | 2.13  |
| 30H*(E) | -2.33 | 0.042  | -0.019 | 0.066  | -1.95  | 1.6    | 1.03   | 4.69   | 5.72   | 0.0116 | -0.0196 | -0.0017  | 5.62  |
| 30H*(Z) | -1.61 | 0.024  | -0.017 | 0.046  | -2.27  | -3.42  | -2.15  | -5.41  | -7.55  | 0.0086 | -0.0185 | 0.0016   | 2.86  |
| 31H*(E) | -2.4  | 0.059  | -0.016 | 0.091  | -3.81  | 0.66   | 4.01   | 2.3    | 6.31   | 0.0196 | 0.1102  | 0.0035   | 5.77  |
| 31H*(Z) | -0.68 | 0.011  | -0.014 | 0.028  | -2.23  | -6.94  | -1.67  | -7.91  | -9.58  | 0.0137 | -0.046  | 0.0022   | 3.21  |
| 32H*(E) | -0.94 | 0.035  | -0.006 | 0.05   | -1.52  | 2.37   | 0.37   | -0.08  | 0.29   | 0.0182 | 0.0751  | 0.0104   | 3.6   |
| 32H*(Z) | -1.91 | 0.064  | -0.002 | 0.086  | -2.72  | 0.31   | 0.58   | -17.21 | -16.63 | 0.0183 | -0.0727 | 0.0083   | 6.91  |
| 33H*(E) | -1.03 | 0.024  | -0.01  | 0.051  | -3.09  | -2.58  | 3.43   | 4.98   | 8.41   | 0.009  | 0.0312  | 1.00E-04 | 3.03  |
| 33H*(Z) | -0.08 | -0.011 | -0.008 | 0.003  | -1.56  | -5.41  | -2.07  | -1.77  | -3.83  | None   | -0.0072 | -0.0001  | 3.23  |
| 34H*(E) | -     | -0.02  | -0.009 | 0.146  | -9.1   | -5.02  | -1.63  | -12.51 | -14.14 | 0.0118 | -0.0789 | -0.0038  | -0.66 |
| 34H*(Z) | -     | -0.058 | -0.013 | 0.157  | -13.29 | -11.22 | -10.61 | -4.98  | -15.59 | 0.0108 | 0.0283  | -0.0011  | 1.02  |
| 35H*(E) | -0.58 | 0.021  | -0.012 | 0.028  | -0.49  | -0.34  | 2.23   | 2.81   | 5.04   | 0.0145 | 0.0367  | 0.0021   | 5.77  |
| 35H*(Z) | 0.1   | -0.009 | -0.01  | -0.012 | 0.16   | -2.58  | 0.58   | -3.94  | -3.36  | 0.0157 | 0.0782  | 0.0029   | 4.36  |
| 36H*(E) | -0.54 | 0.019  | -0.012 | 0.025  | -0.55  | -0.82  | 1.23   | 3.62   | 4.84   | 0.0092 | 0.014   | -0.0023  | 5.55  |
| 36H*(Z) | -0.19 | 0.002  | -0.011 | 0.007  | -0.44  | -1.98  | -1.18  | -3.3   | -4.49  | 0.0106 | -0.0571 | -0.0009  | 3.15  |
| 37H*(E) | -     | 0.058  | -0.019 | 0.133  | -4.53  | 5      | 9.93   | -13.35 | -3.4   | 0.0065 | -0.0811 | -0.0018  | 2.46  |
| 37H*(Z) | -     | 0.026  | -0.017 | 0.127  | -6.48  | 3.69   | -0.55  | 1.37   | 0.84   | 0.0129 | 0.1093  | -0.0003  | 5.5   |
| 38H*(E) | -3.21 | 0.075  | -0.022 | 0.097  | -2.15  | 3.37   | 3.48   | -17.84 | -14.35 | 0.0019 | 0.0459  | -0.0048  | 0.18  |
| 38H*(Z) | -3.5  | 0.079  | -0.022 | 0.118  | -6.24  | 4.36   | -1.56  | 1.21   | -0.35  | 0.017  | 0.0478  | 0.0012   | 6.98  |
| 39H*(E) | -1.62 | 0.048  | -0.013 | 0.059  | -1.09  | -0.55  | 2.74   | 0.91   | 3.66   | 0.0126 | 0.0414  | 0.0009   | 3.59  |
| 39H*(Z) | -1.02 | 0.031  | -0.013 | 0.039  | -0.52  | -12.35 | -0.9   | -5.42  | -6.32  | 0.0163 | -0.0222 | 0.0028   | 3.95  |
| 40H*(E) | -0.39 | 0.021  | -0.005 | 0.014  | 0.89   | -1.5   | 15.56  | -9.19  | 6.37   | 0.0131 | -0.0141 | 0.002    | 1.82  |
| 40H*(Z) | -0.86 | 0.02   | -0.01  | 0.044  | -2.84  | 5.29   | -0.49  | 2.31   | 1.82   | 0.0157 | 0.1085  | 0.0039   | 3.72  |
| 41H*(E) | -2.03 | 0.067  | -0.014 | 0.101  | -3.84  | -2.9   | 0.44   | 0.02   | 0.45   | 0.024  | 0.0863  | 0.0091   | 7.53  |
| 41H*(Z) | -1.5  | 0.05   | -0.013 | 0.078  | -3.47  | 1.19   | 1.32   | -16.24 | -14.92 | 0.0074 | -0.0173 | 0.003    | 1.53  |
| 42H*(E) | -1.41 | 0.041  | -0.012 | 0.047  | -0.13  | -1.44  | -      | -      | -      | 0.006  | 0.0248  | -0.0031  | 1.3   |
| 42H*(Z) | -1.19 | 0.031  | -0.021 | 0.044  | -1.09  | 0.89   | -      | -      | -      | 0.025  | 0.0964  | 0.0106   | 5.32  |
| 43H*(E) | -2.24 | 0.044  | -0.021 | 0.073  | -2.73  | 0.48   | -2.83  | -0.26  | -3.09  | 0.0148 | 0.0596  | 0.0026   | 4.97  |
| 43H*(Z) | -2.92 | 0.053  | -0.02  | 0.094  | -5.33  | 4.31   | 1.55   | -16.62 | -15.07 | 0.0122 | 0.0881  | -0.0002  | 3.56  |
| 44H*(E) | -1.09 | 0.064  | -0.031 | 0.126  | -4.18  | -0.36  | -6.89  | -0.04  | -6.93  | 0.0138 | 0.0099  | -0.0007  | 6.04  |
| 44H*(Z) | -     | -0.026 | -0.006 | 0.023  | -2.46  | -0.26  | -1.79  | -2.79  | -4.57  | 0.0015 | 0.0029  | -0.0028  | -0.42 |

\* colour chart should be considered within each column

**Table S9.** Change of geometric and electronic parameters in **9-44** during transition from vacuum to acetonitrile (PCM).

| Compd | $r_1$ , Å | $r_2$ , Å | $\omega$ , deg | $\chi_N$ , deg | $\tau$ , deg | $\vartheta$ , deg | $q_{NPA}$ | $q_{MK}$ | $q_H$     | $\delta$ , ppm |
|-------|-----------|-----------|----------------|----------------|--------------|-------------------|-----------|----------|-----------|----------------|
| 9(E)  | 0*        | -0.011    | -1.98          | -1.24          | -1.27        | -2.51             | 0.0082    | 0.0968   | -0.0018   | 3.92           |
| 9(Z)  | -0.005    | -0.011    | -2.37          | 1.96           | -0.84        | 1.12              | 0.0118    | -0.1054  | -0.0007   | 3.97           |
| 10(E) | -0.003    | -0.011    | 0.26           | 0.22           | 0.68         | 0.91              | 0.0109    | 0.0245   | -0.0006   | 5.02           |
| 10(Z) | -0.002    | -0.011    | -2.98          | 0.67           | 0.07         | 0.74              | 0.0124    | -0.0159  | 1.00E-04  | 5.48           |
| 11(E) | -0.008    | -0.011    | 0.02           | 0.05           | 0.81         | 0.87              | 0.0095    | 0.0259   | -0.0016   | 4.75           |
| 11(Z) | -0.003    | -0.011    | -3.84          | 0.33           | -0.17        | 0.16              | 0.0121    | -0.0675  | -0.0006   | 5.58           |
| 12(E) | -0.005    | -0.012    | 2.66           | -0.27          | 0.5          | 0.22              | 0.0094    | 0.0057   | -0.0018   | 4.98           |
| 12(Z) | -0.001    | -0.012    | -7.79          | -0.21          | 0.41         | 0.19              | 0.012     | -0.0572  | -0.001    | 5.86           |
| 13(E) | 0.003     | -0.011    | 0.93           | 0.77           | 0.53         | 1.3               | 0.0115    | 0.0161   | 0         | 5.27           |
| 13(Z) | 0.005     | -0.009    | -0.41          | 1.91           | 0.46         | 2.38              | 0.013     | 0.0021   | 0.001     | 5.59           |
| 14(E) | 0.037     | -0.008    | 4.82           | 0.99           | 1.53         | 2.53              | 0.0132    | 0.0273   | 0.0019    | 5.43           |
| 14(Z) | 0.035     | -0.006    | 2.68           | 0.98           | 0.3          | 1.29              | 0.0144    | 0.0083   | 0.0026    | 5.52           |
| 15(E) | -0.007    | -0.012    | 0.01           | 0.27           | 0.58         | 0.85              | 0.0104    | 0.0065   | -0.001    | 4.96           |
| 15(Z) | -0.006    | -0.011    | -2.57          | 0.83           | 0.13         | 0.96              | 0.012     | -0.0098  | 0         | 5.42           |
| 16(E) | 0.004     | -0.009    | 1.6            | 0.52           | 1.01         | 1.53              | 0.0129    | 0.0275   | 0.0015    | 5.24           |
| 16(Z) | 0.003     | -0.008    | -0.88          | 1.01           | 0.55         | 1.57              | 0.0139    | -0.0276  | 0.0023    | 5.48           |
| 17(E) | -0.003    | -0.011    | 0.64           | 0.38           | 0.74         | 1.11              | 0.0106    | 0.0357   | -0.0009   | 5              |
| 17(Z) | -0.005    | -0.011    | -2.37          | 0.76           | 0.03         | 0.77              | 0.012     | -0.0107  | -1.00E-04 | 5.4            |
| 18(E) | -0.003    | -0.011    | 0.22           | -0.09          | 0.41         | 0.32              | 0.0105    | -0.0039  | -0.0014   | 4.81           |
| 18(Z) | -0.004    | -0.009    | -3.52          | 1.81           | 0.16         | 1.98              | 0.0108    | -0.0331  | -0.0002   | 5.26           |
| 19(E) | -0.003    | -0.012    | 0.48           | 0.29           | 1.65         | 1.95              | 0.0084    | -0.0067  | -0.0036   | 5.11           |
| 19(Z) | -0.005    | -0.01     | -1.21          | -1.62          | -1.28        | -2.89             | 0.0102    | -0.1026  | -0.0015   | 5.09           |
| 20(E) | -0.005    | -0.012    | 0.97           | 0.99           | 3.13         | 4.12              | 0.0092    | 0.0003   | -0.0039   | 5.02           |
| 20(Z) | 0.001     | -0.01     | 0.62           | -3.46          | -1.92        | -5.38             | 0.0086    | -0.082   | -0.0018   | 4.25           |
| 21(E) | -0.005    | -0.012    | -0.03          | 0.61           | 0.78         | 1.39              | 0.0105    | 0.0278   | -0.0011   | 4.96           |
| 21(Z) | -0.008    | -0.01     | -2.42          | 1.11           | 0            | 1.11              | 0.0115    | 0.0003   | -0.0003   | 5.16           |
| 22(E) | 0.046     | -0.005    | 5.59           | 0.67           | 1.68         | 2.35              | 0.015     | 0.0292   | 0.0042    | 5.54           |
| 22(Z) | 0.047     | -0.004    | -6.2           | 0.8            | 0.75         | 1.55              | 0.016     | -0.0106  | 0.0049    | 5.58           |
| 23(E) | -0.003    | -0.012    | -0.3           | 0.43           | 0.71         | 1.15              | 0.0097    | 0.0248   | -0.002    | 5.02           |
| 23(Z) | -0.005    | -0.011    | -2.5           | 0.75           | 0.24         | 0.99              | 0.0111    | -0.0073  | -0.001    | 5.23           |
| 24(E) | -0.005    | -0.011    | 0.36           | -0.34          | 0.92         | 0.58              | 0.0094    | -0.0034  | -0.0021   | 4.52           |
| 24(Z) | -0.001    | -0.009    | -5.62          | 0.61           | 0.32         | 0.93              | 0.0105    | -0.05    | -0.0009   | 5.74           |
| 25(E) | -0.004    | -0.011    | 1.31           | 0.56           | 1.55         | 2.11              | 0.0072    | -0.0326  | -0.0042   | 5.2            |
| 25(Z) | -0.003    | -0.011    | 2.59           | -1.27          | -1.28        | -2.55             | 0.009     | -0.101   | -0.0026   | 5.13           |
| 26(E) | -0.002    | -0.011    | 1.49           | 1.29           | 2.58         | 3.86              | 0.0091    | -0.019   | -0.0037   | 5.29           |
| 26(Z) | 0.007     | -0.01     | 1.82           | -1.94          | -1.41        | -3.36             | 0.0087    | -0.1093  | -0.0015   | 4.37           |
| 27(E) | 0.009     | -0.008    | 3.35           | 0.03           | 1.28         | 1.31              | 0.0105    | 0.0101   | 1.00E-04  | 4.78           |
| 27(Z) | 0.013     | -0.007    | 3.97           | 0.23           | -1.05        | -0.82             | 0.0142    | -0.1118  | 0.0022    | 5.75           |
| 28(E) | -0.002    | -0.013    | 5.85           | 1.22           | -2.27        | -1.05             | -0.0032   | 0.0592   | -0.0046   | 5.21           |
| 28(Z) | -0.018    | -0.008    | 7.66           | -2.65          | -1.41        | -4.06             | 0.0047    | -0.0506  | -0.0024   | 4.27           |
| 29(E) | -0.002    | -0.013    | 0.57           | -0.71          | 1.18         | 0.47              | 0.0063    | 0.0156   | -0.0057   | 5.38           |
| 29(Z) | 0.001     | -0.013    | 4.97           | -4.8           | -0.88        | -5.69             | 0.0061    | -0.143   | -0.0042   | 5.03           |
| 30(E) | -0.013    | -0.008    | -17.96         | 1.92           | 2.87         | 4.79              | 0.0097    | -0.0172  | -0.0027   | 5.21           |
| 30(Z) | 0.019     | -0.007    | 3.63           | -2.4           | -1.48        | -3.87             | 0.0101    | -0.0736  | 0.0003    | 4.46           |
| 31(E) | 0         | -0.01     | 0.06           | 1.34           | 1.54         | 2.89              | 0.0105    | 0.0163   | -0.0004   | 4.89           |
| 31(Z) | 0.011     | -0.012    | 0.85           | -1.18          | 1.31         | 0.13              | 0.0112    | 0.0499   | -0.0022   | 6.29           |
| 32(E) | 0.007     | -0.014    | 0.11           | -2.66          | -1.92        | -4.58             | 0.0096    | 0.0195   | -0.0022   | 5.07           |
| 32(Z) | 0.009     | -0.013    | -0.54          | 0.57           | -2.32        | -1.75             | 0.0066    | -0.0061  | -0.0013   | 5.5            |
| 33(E) | 0.006     | -0.008    | -0.44          | -2.36          | 0.98         | -1.38             | 0.0018    | -0.0597  | -0.0037   | 3.03           |
| 33(Z) | -0.004    | -0.009    | -3.16          | 0.85           | 1.34         | 2.18              | 0.0098    | -0.0085  | -0.0027   | 4.88           |
| 34(E) | 0         | -0.014    | 2.07           | -4.04          | -0.45        | -4.49             | -0.0015   | 0.0741   | -0.0066   | 3.44           |
| 34(Z) | -0.013    | -0.007    | 3.98           | -2.45          | 0.55         | -1.9              | 0.0083    | -0.0399  | -0.0017   | 5.24           |
| 35(E) | -0.005    | -0.01     | -2.57          | -3.14          | 0.01         | -3.13             | 0.0044    | 0.0083   | -0.0034   | 3.84           |
| 35(Z) | -0.002    | -0.014    | -2.65          | -3.81          | 0.23         | -3.57             | 0.0087    | -0.0515  | -0.0032   | 4.98           |
| 36(E) | 0         | -0.01     | 2.33           | -0.65          | 0.68         | 0.03              | 0.0037    | -0.0105  | -0.0049   | 4.43           |
| 36(Z) | 0         | -0.012    | -0.83          | -2.86          | -0.94        | -3.81             | 0.0079    | -0.1498  | -0.0041   | 5.17           |
| 37(E) | 0.013     | -0.014    | 0.71           | 2.76           | -1.82        | 0.93              | 0.0062    | -0.0015  | -0.0036   | 4.7            |
| 37(Z) | 0.005     | -0.011    | 0.2            | 2.03           | 1.12         | 3.15              | 0.0098    | 0.041    | -0.002    | 5.77           |

|       |        |        |       |       |       |       |        |         |         |      |
|-------|--------|--------|-------|-------|-------|-------|--------|---------|---------|------|
| 38(E) | 0.02   | -0.015 | 1.04  | 4.97  | -4.93 | 0.05  | 0.0023 | -0.0284 | -0.0056 | 3.36 |
| 38(Z) | -0.002 | -0.014 | -1.28 | 0.63  | 0.17  | 0.8   | 0.0108 | -0.0097 | -0.0032 | 6.48 |
| 39(E) | 0.009  | -0.014 | 3.01  | 0.31  | -2.44 | -2.13 | 0.0033 | 0.0073  | -0.0041 | 4.03 |
| 39(Z) | 0.008  | -0.013 | -0.31 | -1.01 | 0.71  | -0.3  | 0.0116 | 0.0257  | -0.0019 | 6.36 |
| 40(E) | 0.009  | -0.01  | 5.04  | 3.13  | 1.04  | 4.17  | 0.0106 | -0.0128 | -0.0006 | 4.98 |
| 40(Z) | 0.009  | -0.01  | -0.28 | 1.34  | -1.79 | -0.45 | 0.0132 | 0.0201  | 0.0017  | 4.49 |
| 41(E) | 0.007  | -0.01  | 0.78  | -1.54 | -1.98 | -3.51 | 0.0131 | 0.0301  | 0.0016  | 6.06 |
| 41(Z) | 0.004  | -0.006 | 0.11  | 0.5   | 2.36  | 2.86  | 0.0137 | -0.0121 | 0.0019  | 5.27 |
| 42(E) | 0.002  | -0.01  | -0.48 | -     | -     | -     | 0.0138 | 0.055   | -0.0009 | 5.99 |
| 42(Z) | -0.007 | -0.006 | -0.19 | -     | -     | -     | 0.0182 | 0.0148  | 0.0018  | 5.36 |
| 43(E) | 0.017  | -0.012 | 0.81  | -1.29 | 0.72  | -0.58 | 0.0053 | 0.0716  | -0.0033 | 3.46 |
| 43(Z) | 0.023  | -0.014 | 0.51  | 1.35  | -2.46 | -1.11 | 0.0094 | 0.0943  | -0.0028 | 6.7  |
| 44(E) | -0.006 | -0.016 | -0.64 | 0.11  | -1.22 | -1.11 | 0.0061 | -0.001  | -0.0045 | 5.09 |
| 44(Z) | 0.017  | -0.01  | -1.2  | -0.12 | -0.14 | -0.26 | 0.013  | 0.0028  | 0.0007  | 6.05 |

\* colour chart should be considered within each column

**Table S10.** Geometric and electronic parameters of perchlorates in acetonitrile (PCM).

| Compd   | $E_{\text{HB}}$ ,<br>kcal·mol <sup>-1</sup> | $r_1$ , Å | $r_2$ , Å | $r_3$ , Å | $r_4$ , Å | $\alpha$ ,<br>deg | $\omega$ ,<br>deg | $\chi_N$ ,<br>deg | $\tau$ ,<br>deg | $\vartheta$ ,<br>deg | $q_{\text{NPA}}$ | $q_{\text{MK}}$ | $q_{\text{H}}$ | $\delta$ ,<br>ppm |
|---------|---------------------------------------------|-----------|-----------|-----------|-----------|-------------------|-------------------|-------------------|-----------------|----------------------|------------------|-----------------|----------------|-------------------|
| 10H*(E) | 4.65*                                       | 2.811     | 1.401     | 1.901     | 2.249     | 144.68            | -7.77             | 40.07             | 16.35           | 56.42                | 0.7412           | 0.5995          | 0.1811         | 182.61            |
| 10H*(Z) | 5.03                                        | 2.804     | 1.398     | 1.884     | 2.423     | 146.25            | 6.67              | 32.8              | 6.77            | 39.56                | 0.7353           | 0.5925          | 0.1845         | 187.1             |
| 12H*(E) | 7.43                                        | 2.735     | 1.41      | 1.766     | 2.444     | 152.25            | -9.81             | 42.36             | 19.93           | 62.29                | 0.7485           | 0.5822          | 0.1844         | 183.21            |
| 12H*(Z) | 7.3                                         | 2.745     | 1.405     | 1.774     | 2.689     | 153.61            | 7.74              | 34.79             | 5.88            | 40.67                | 0.7395           | 0.6542          | 0.1884         | 188.13            |
| 14H*(E) | 5.36                                        | 2.774     | 1.408     | 1.863     | 2.223     | 144.53            | -9.84             | 41.32             | 19.08           | 60.39                | 0.746            | 0.6055          | 0.1837         | 182.75            |
| 14H*(Z) | 5.61                                        | 2.774     | 1.402     | 1.853     | 2.425     | 146.23            | 6.94              | 33.59             | 6.87            | 40.47                | 0.7379           | 0.6204          | 0.1874         | 187.42            |
| 16H*(E) | 4.81                                        | 2.788     | 1.407     | 1.894     | 2.2       | 142.39            | -16.48            | 40.14             | 19.43           | 59.56                | 0.7471           | 0.6257          | 0.1827         | 182.52            |
| 16H*(Z) | 5.36                                        | 2.782     | 1.403     | 1.867     | 2.398     | 145.66            | 7.5               | 33.87             | 6.7             | 40.57                | 0.7377           | 0.6046          | 0.1881         | 187.33            |
| 18H*(E) | 5.41                                        | 2.785     | 1.398     | 1.862     | 2.414     | 146.56            | -1.16             | 34.41             | 10.38           | 44.79                | 0.7285           | 0.5181          | 0.1784         | 181.6             |
| 18H*(Z) | 5.21                                        | 2.793     | 1.396     | 1.875     | 2.507     | 146.24            | 1.68              | 29.14             | 8.15            | 37.29                | 0.7304           | 0.4859          | 0.181          | 186.26            |
| 19H*(E) | 4.71                                        | 2.807     | 1.404     | 1.901     | 2.352     | 144.53            | -1.15             | 34.22             | 10.59           | 44.82                | 0.7396           | 0.5049          | 0.1723         | 180.55            |
| 19H*(Z) | 4.79                                        | 2.802     | 1.401     | 1.899     | 2.428     | 144.28            | -1.02             | 30.22             | 8.75            | 38.97                | 0.7411           | 0.7524          | 0.1759         | 186.86            |
| 24H*(E) | 8.33                                        | 2.715     | 1.4       | 1.735     | 2.949     | 155.46            | 5.81              | 31.89             | 8.32            | 40.21                | 0.7266           | 0.5693          | 0.1815         | 181.7             |
| 24H*(Z) | 8.22                                        | 2.718     | 1.4       | 1.739     | 3.198     | 155.64            | -4.24             | 28.36             | 6.73            | 35.09                | 0.7381           | 0.5686          | 0.1865         | 185.57            |
| 25H*(E) | 8.05                                        | 2.721     | 1.411     | 1.744     | 2.649     | 154.28            | -3.51             | 34.86             | 11.81           | 46.67                | 0.742            | 0.5166          | 0.1744         | 180.33            |
| 25H*(Z) | 8.06                                        | 2.723     | 1.409     | 1.746     | 2.827     | 154.99            | 2                 | 30.7              | 7.74            | 38.44                | 0.7437           | 0.7028          | 0.1795         | 187.04            |
| 26H*(E) | 5.94                                        | 2.765     | 1.415     | 1.835     | 2.398     | 147.05            | -20.75            | 34.04             | 17.81           | 51.84                | 0.7442           | 0.5393          | 0.173          | 179.9             |
| 26H*(Z) | 6.97                                        | 2.74      | 1.415     | 1.791     | 2.683     | 150.05            | 2.12              | 32.21             | 6.82            | 39.03                | 0.7617           | 0.6103          | 0.1843         | 188.7             |
| 29H*(E) | 6.23                                        | 2.769     | 1.403     | 1.819     | 2.472     | 150.13            | -2.36             | 38.86             | 12.17           | 51.03                | 0.749            | 0.5178          | 0.1783         | 183.08            |
| 29H*(Z) | 6.5                                         | 2.765     | 1.404     | 1.808     | 2.531     | 151.28            | -2.81             | 36.78             | 13.52           | 50.29                | 0.7544           | 0.6219          | 0.1821         | 189.64            |
| 31H*(E) | 5.77                                        | 2.779     | 1.399     | 1.843     | 3.086     | 148.97            | -3.19             | 36.28             | 8.11            | 44.39                | 0.728            | 0.6259          | 0.1833         | 181.63            |
| 31H*(Z) | 4.35                                        | 2.829     | 1.395     | 1.925     | 2.534     | 144.62            | -3.93             | 34.15             | 4.92            | 39.06                | 0.7335           | 0.6134          | 0.1847         | 187.6             |
| 32H*(E) | 2.81                                        | 2.865     | 1.568     | 2.047     | 2.075     | 134.62            | -3.22             | 53.63             | 33.26           | 86.89                | 0.8164           | 0.575           | 0.2348         | 175.83            |
| 32H*(Z) | 5.05                                        | 2.808     | 1.588     | 1.883     | 3.951     | 147.19            | 2.03              | 50.4              | 20.35           | 70.75                | 0.794            | 0.5909          | 0.2446         | 178.74            |
| 33H*(E) | 2.72                                        | 2.754     | 1.381     | 2.071     | 2.176     | 122.6             | 4.1               | 26.42             | 6.43            | 32.85                | 0.7303           | 0.6283          | 0.1705         | 180.33            |
| 33H*(Z) | 1.43                                        | 2.809     | 1.367     | 2.365     | 1.986     | 105.21            | -3.58             | 20.81             | 0.02            | 20.82                | 0.73             | 0.7694          | 0.171          | 180.64            |
| 35H*(E) | 3.83                                        | 2.765     | 1.391     | 1.966     | 2.616     | 133.42            | 8.92              | 27.29             | 0.73            | 28.02                | 0.7228           | 0.5073          | 0.1807         | 181.95            |
| 35H*(Z) | 4.55                                        | 2.752     | 1.391     | 1.913     | 3.574     | 137.38            | -7.64             | 29.78             | 2.73            | 32.51                | 0.7204           | 0.6373          | 0.1786         | 183.93            |
| 36H*(E) | 4.98                                        | 2.726     | 1.393     | 1.891     | 3.396     | 137.17            | -2.09             | 24.56             | 4.15            | 28.71                | None             | 0.4874          | 0.1738         | 181.17            |
| 36H*(Z) | 4.31                                        | 2.748     | 1.292     | 1.933     | 3.007     | 135.1             | -14.01            | 25.39             | 5.73            | 31.12                | 0.7247           | 0.5692          | 0.17           | 182.93            |
| 38H*(E) | 8.39                                        | 2.734     | 1.412     | 1.729     | 3.861     | 161.63            | 56.36             | 32.82             | 0.25            | 33.07                | 0.7363           | 0.6592          | 0.1904         | 181.49            |
| 38H*(Z) | 7.85                                        | 2.748     | 1.418     | 1.749     | 3.771     | 159.79            | 58.29             | 33.98             | 4.4             | 38.38                | 0.738            | 0.5315          | 0.189          | 181.15            |
| 43H*(E) | 3.31                                        | 2.781     | 1.402     | 2.009     | 2.169     | 129.25            | 24.97             | 35.38             | 9.7             | 45.08                | 0.755            | 0.6392          | 0.178          | 183.93            |
| 43H*(Z) | 3.19                                        | 2.787     | 1.403     | 2.021     | 2.129     | 128.77            | 29.28             | 32.45             | 4.69            | 37.14                | 0.7515           | 0.662           | 0.1764         | 186.01            |

\* colour chart should be considered within each column

**Table S11.** Change of geometric and electronic parameters during transition from base forms to perchlorates in acetonitrile (PCM).

| Compd                | $\Delta r_1$ , Å | $\Delta r_2$ , Å | $\Delta \omega$ , deg | $\Delta \chi_N$ , deg | $\Delta \tau$ , deg | $\Delta \theta$ , deg | $\Delta q_{NPA}$ | $\Delta q_{MK}$ | $\Delta q_H$ | $\Delta \delta$ , ppm |
|----------------------|------------------|------------------|-----------------------|-----------------------|---------------------|-----------------------|------------------|-----------------|--------------|-----------------------|
| 10H <sup>+</sup> (E) | 0.025            | 0.04             | -7.3                  | 29.24                 | 11.35               | 40.59                 | 0.0309           | -0.0482         | 0.0159       | 7.11                  |
| 10H <sup>+</sup> (Z) | 0.014            | 0.035            | -9.77                 | 23.56                 | 4.68                | 28.24                 | 0.0202           | -0.1011         | 0.0146       | 10.06                 |
| 12H <sup>+</sup> (E) | -0.024           | 0.051            | 6.56                  | 30.17                 | 15.5                | 45.67                 | 0.0386           | -0.0097         | 0.0203       | 8.09                  |
| 12H <sup>+</sup> (Z) | -0.016           | 0.045            | 4.71                  | 22.82                 | 3.09                | 25.92                 | 0.0262           | 0.0389          | 0.0206       | 11.11                 |
| 14H <sup>+</sup> (E) | -0.052           | 0.04             | -18.12                | 29.1                  | 13.46               | 42.56                 | 0.033            | -0.0351         | 0.0143       | 6.35                  |
| 14H <sup>+</sup> (Z) | -0.049           | 0.032            | -22                   | 22.56                 | 4.22                | 26.78                 | 0.0196           | -0.0783         | 0.0133       | 10.09                 |
| 16H <sup>+</sup> (E) | 0.016            | 0.039            | -4.02                 | 28.92                 | 13.72               | 42.64                 | 0.0336           | -0.0006         | 0.0124       | 6.96                  |
| 16H <sup>+</sup> (Z) | 0.01             | 0.032            | -14.4                 | 24.3                  | 4.03                | 28.33                 | 0.019            | -0.0599         | 0.0128       | 10.13                 |
| 18H <sup>+</sup> (E) | 0.027            | 0.039            | -11.09                | 26.18                 | 6.19                | 32.37                 | 0.0143           | -0.0389         | 0.0134       | 5.47                  |
| 18H <sup>+</sup> (Z) | 0.023            | 0.035            | -13.68                | 22.52                 | 5.32                | 27.84                 | 0.0092           | -0.0669         | 0.0089       | 10.69                 |
| 19H <sup>+</sup> (E) | 0.047            | 0.041            | -9.14                 | 25.87                 | 6.71                | 32.58                 | 0.0182           | -0.067          | 0.0125       | 4.64                  |
| 19H <sup>+</sup> (Z) | 0.033            | 0.036            | -10.79                | 22.17                 | 5.2                 | 27.37                 | 0.014            | 0.0717          | 0.0121       | 10.03                 |
| 24H <sup>+</sup> (E) | -0.027           | 0.044            | 3.24                  | 21.26                 | 3.28                | 24.55                 | 0.0136           | 0.007           | 0.0177       | 5.9                   |
| 24H <sup>+</sup> (Z) | -0.028           | 0.042            | 0.45                  | 18.92                 | 3.43                | 22.35                 | 0.0198           | -0.0108         | 0.017        | 9.77                  |
| 25H <sup>+</sup> (E) | -0.023           | 0.05             | -8                    | 25.72                 | 8.63                | 34.35                 | 0.024            | -0.0035         | 0.014        | 5.24                  |
| 25H <sup>+</sup> (Z) | -0.022           | 0.047            | -3.85                 | 20.93                 | 4.1                 | 25.03                 | 0.0214           | 0.0736          | 0.017        | 9.78                  |
| 26H <sup>+</sup> (E) | -0.013           | 0.044            | 10.7                  | 21.1                  | 12.65               | 33.75                 | 0.0266           | -0.0175         | 0.0089       | 4.31                  |
| 26H <sup>+</sup> (Z) | -0.025           | 0.043            | -12.76                | 16.81                 | 5.56                | 22.37                 | 0.0344           | -0.0274         | 0.0159       | 10.17                 |
| 29H <sup>+</sup> (E) | 0.017            | 0.048            | -4.02                 | 28.58                 | 9.19                | 37.76                 | 0.0336           | -0.0753         | 0.0182       | 7.09                  |
| 29H <sup>+</sup> (Z) | 0.011            | 0.049            | -2.53                 | 28.83                 | 11.48               | 40.31                 | 0.0361           | 0.0018          | 0.0193       | 12.98                 |
| 31H <sup>+</sup> (E) | -0.009           | 0.038            | -13.13                | 24.19                 | 2.94                | 27.12                 | 0.0185           | 0.0068          | 0.0159       | 6.04                  |
| 31H <sup>+</sup> (Z) | 0.006            | 0.024            | -15.91                | 22.31                 | -2.36               | 19.95                 | -0.0005          | -0.0533         | 0.0168       | 11.29                 |
| 32H <sup>+</sup> (E) | 0.035            | 0.201            | -5.43                 | 34.44                 | 29.23               | 63.67                 | 0.1033           | -0.0014         | 0.0737       | -1.42                 |
| 32H <sup>+</sup> (Z) | -0.037           | 0.221            | 1.11                  | 31.43                 | 20.3                | 51.74                 | 0.077            | -0.0077         | 0.083        | -0.53                 |
| 33H <sup>+</sup> (E) | 0.017            | 0.023            | -7.84                 | -325.21               | 5.38                | -319.83               | -0.0028          | 0.012           | 0.0037       | 3.34                  |
| 33H <sup>+</sup> (Z) | 0.071            | 0.011            | -15.06                | 19.15                 | -5.62               | 13.53                 | 0.0079           | 0.0628          | 0.0061       | 3.17                  |
| 35H <sup>+</sup> (E) | -0.009           | 0.03             | 7.82                  | -329.83               | -2.81               | -332.64               | -0.0022          | -0.047          | 0.0106       | 5.89                  |
| 35H <sup>+</sup> (Z) | -0.023           | 0.03             | -10.24                | -322.88               | -1.46               | -324.34               | -0.005           | -0.0254         | 0.0132       | 5.6                   |
| 36H <sup>+</sup> (E) | -0.022           | 0.03             | -3.15                 | 24.56                 | 4.15                | 28.71                 | None             | -0.0421         | 0.0063       | 5.26                  |
| 36H <sup>+</sup> (Z) | -0.006           | -0.071           | -3.77                 | 25.39                 | 5.73                | 31.12                 | -0.0129          | -0.167          | 0.0074       | 4.41                  |
| 38H <sup>+</sup> (E) | -0.055           | 0.047            | -7.77                 | 26.04                 | -3.89               | 22.14                 | 0.0211           | 0.0076          | 0.0246       | 7.17                  |
| 38H <sup>+</sup> (Z) | -0.04            | 0.05             | -5.64                 | 23.9                  | 0.42                | 24.32                 | 0.0223           | -0.1141         | 0.0235       | 7.32                  |
| 43H <sup>+</sup> (E) | -0.018           | 0.035            | -7.33                 | 18.03                 | 4.28                | 22.32                 | 0.0347           | -0.0965         | 0.0093       | 7.08                  |
| 43H <sup>+</sup> (Z) | -0.022           | 0.036            | -3.94                 | 18.95                 | 0.03                | 18.98                 | 0.0336           | -0.0945         | 0.0106       | 9.56                  |

\* colour chart should be considered within each column



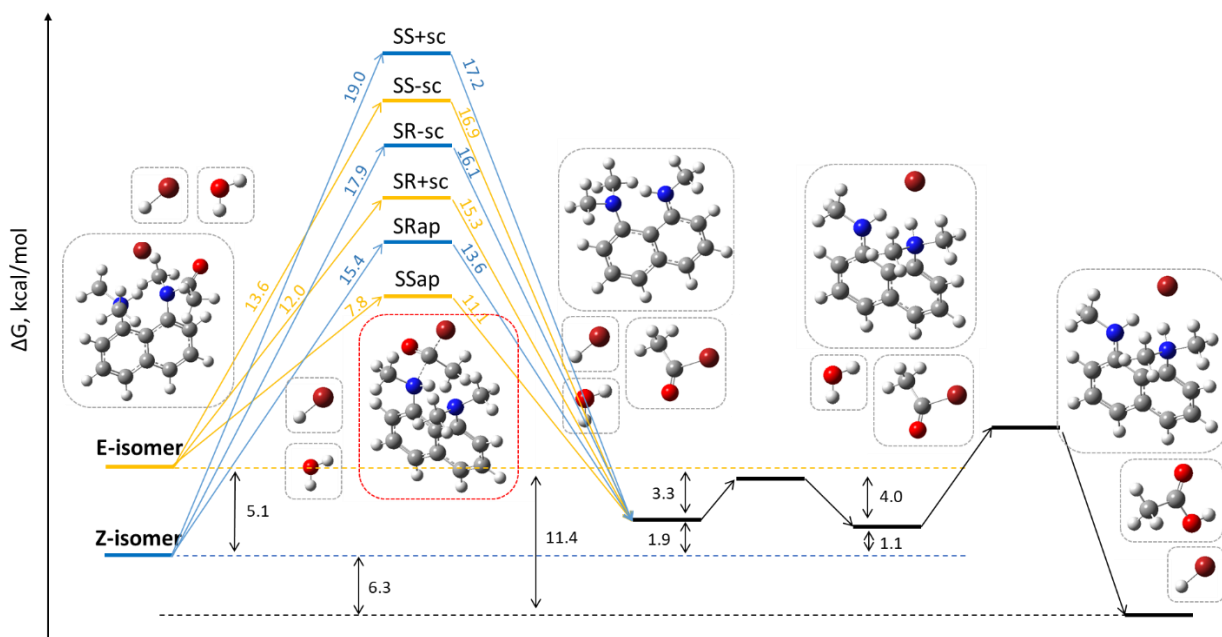

Figure 5. Energy profile for reaction of cation  $10H^+$  with  $Br^-$  anion in vacuum.

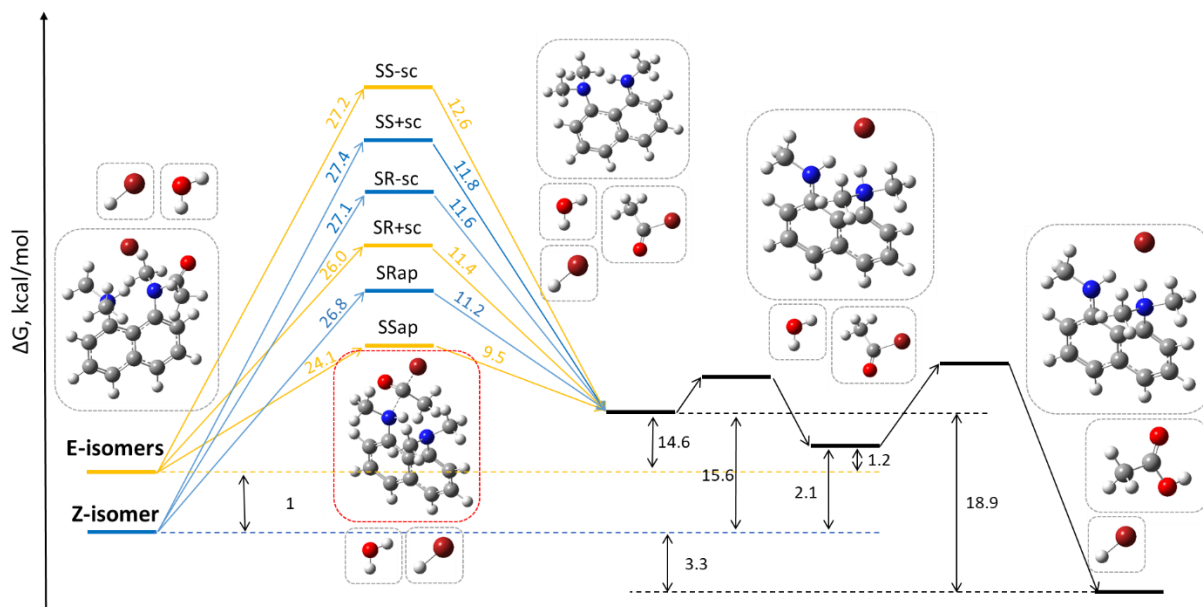

Figure 6. Energy profile for reaction of cation  $10H^+$  with  $Br^-$  anion in acetonitrile (PCM).

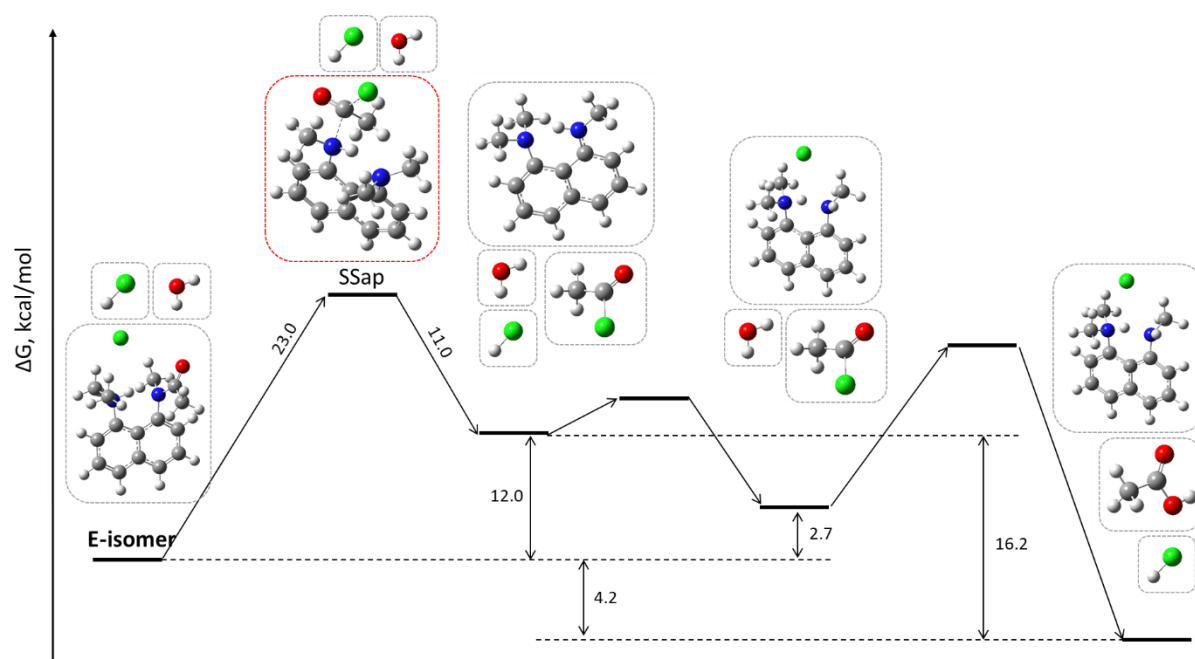

Figure 7. Energy profile for reaction of cation  $10H^+$  with  $Cl^-$  anion in acetonitrile (PCM).

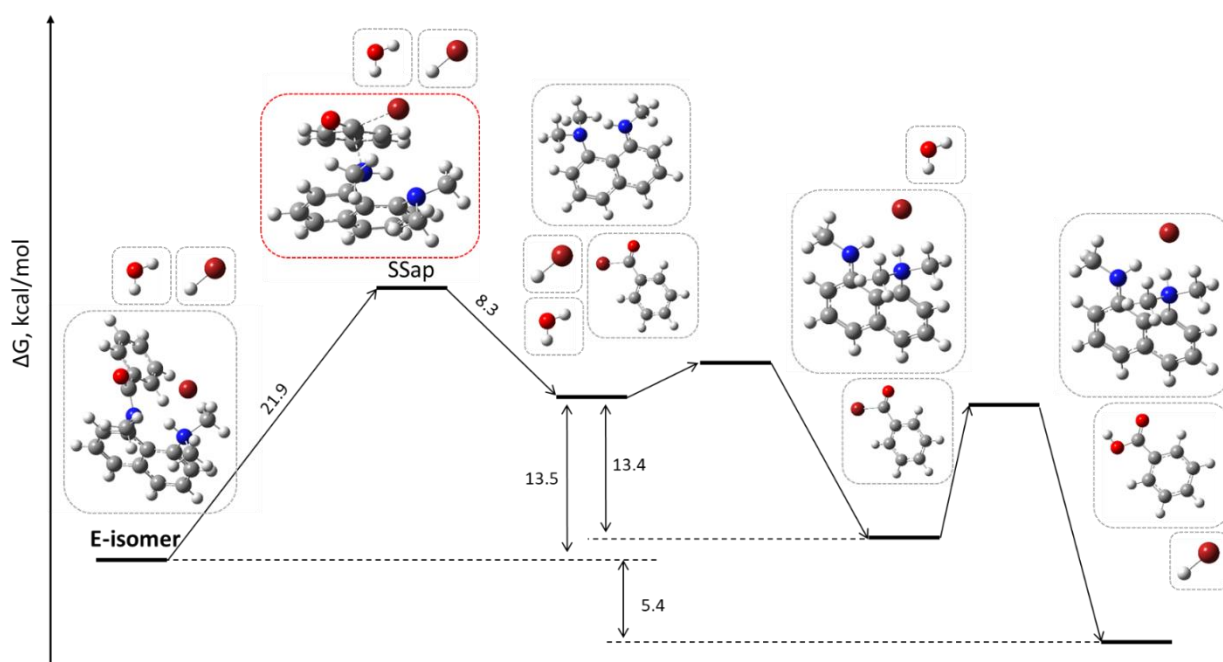

Figure 8. Energy profile for reaction of cation  $9H^+$  with  $Br^-$  anion in acetonitrile (PCM).

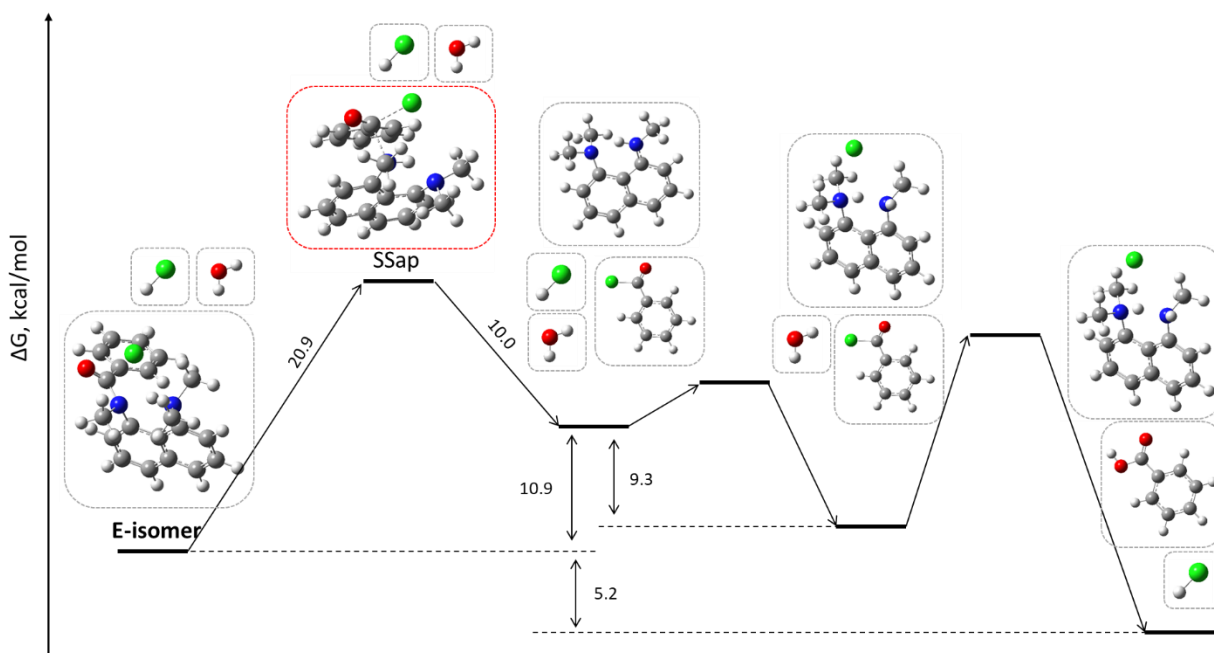

Figure 9. Energy profile for reaction of cation  $9H^+$  with  $Cl^-$  anion in acetonitrile (PCM).

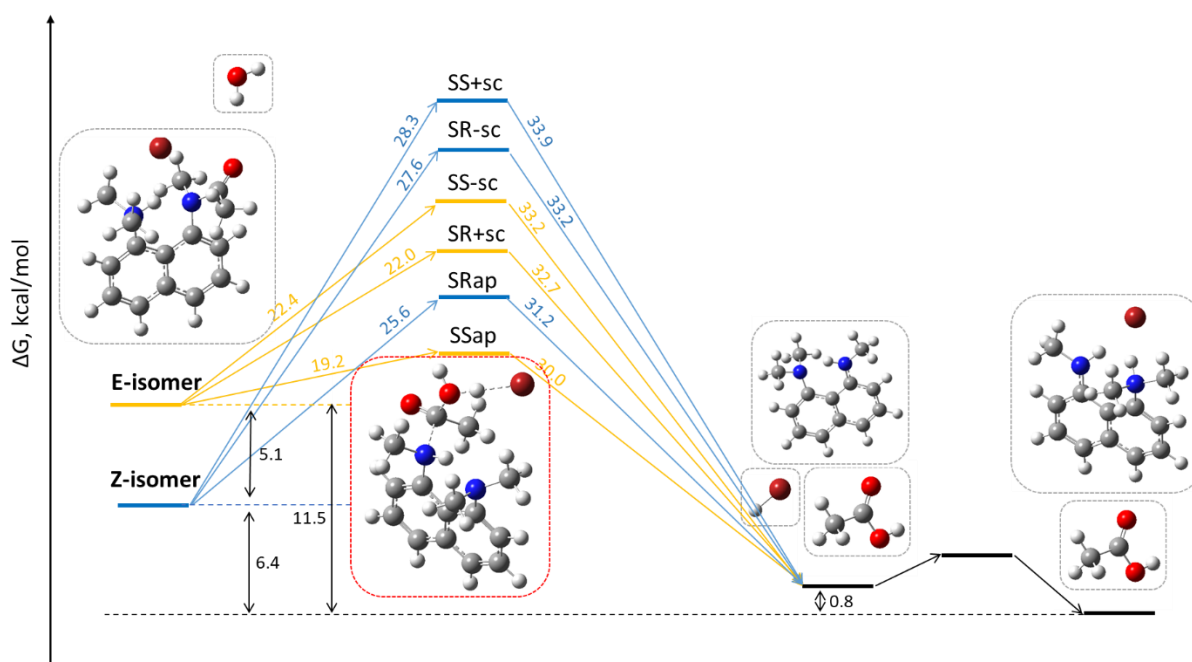

Figure 10. Energy profile for  $Br^-$  assisted reaction of cation  $10H^+$  with  $H_2O$  molecule in vacuum.

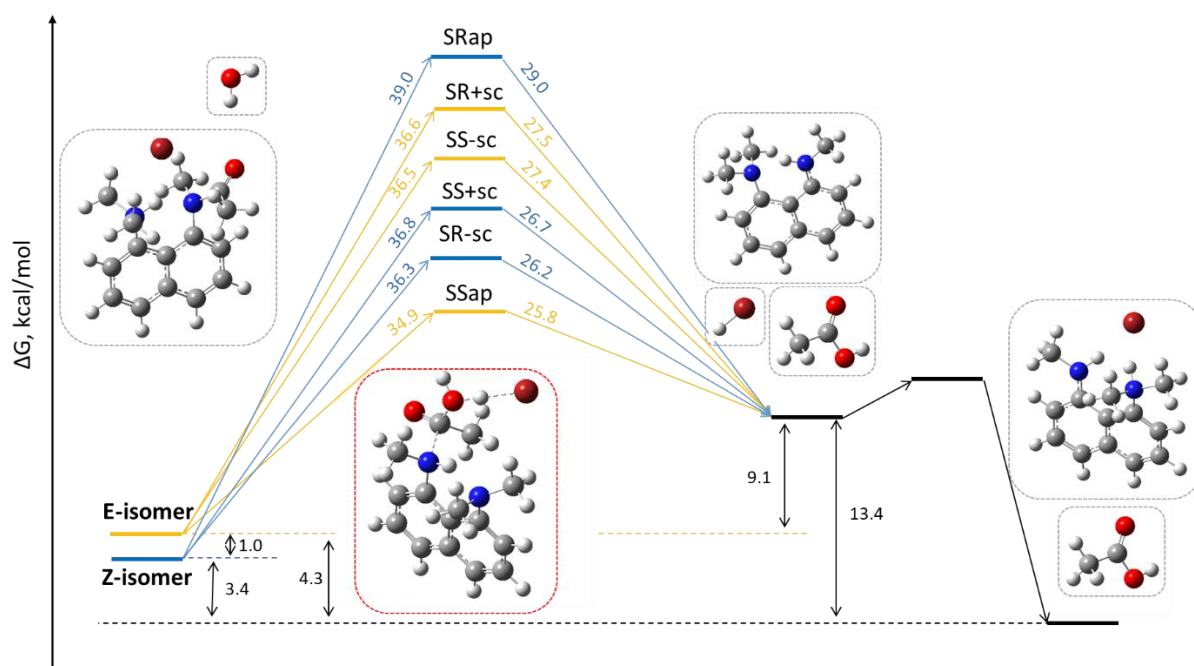

Figure 11. Energy profile for Br<sup>-</sup> assisted reaction of cation 10H<sup>+</sup> with H<sub>2</sub>O molecule in acetonitrile (PCM).

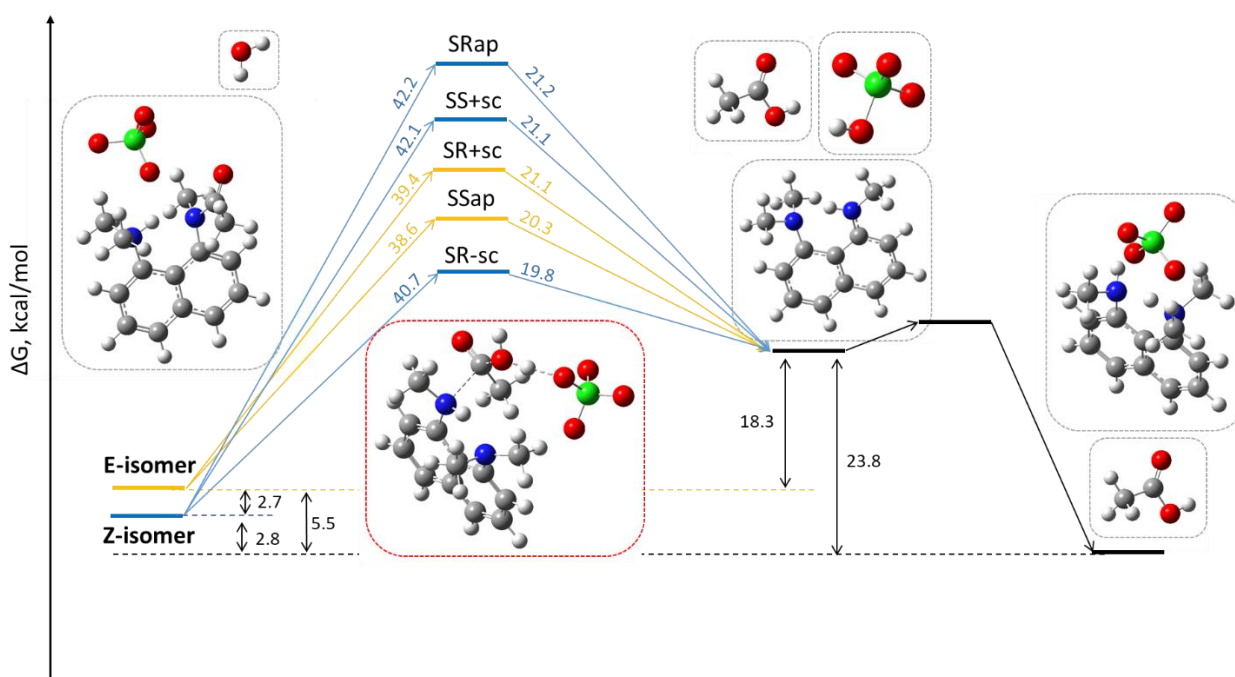

Figure 12. Energy profile for ClO<sub>4</sub><sup>-</sup> assisted reaction of cation 10H<sup>+</sup> with H<sub>2</sub>O molecule in acetonitrile (PCM).

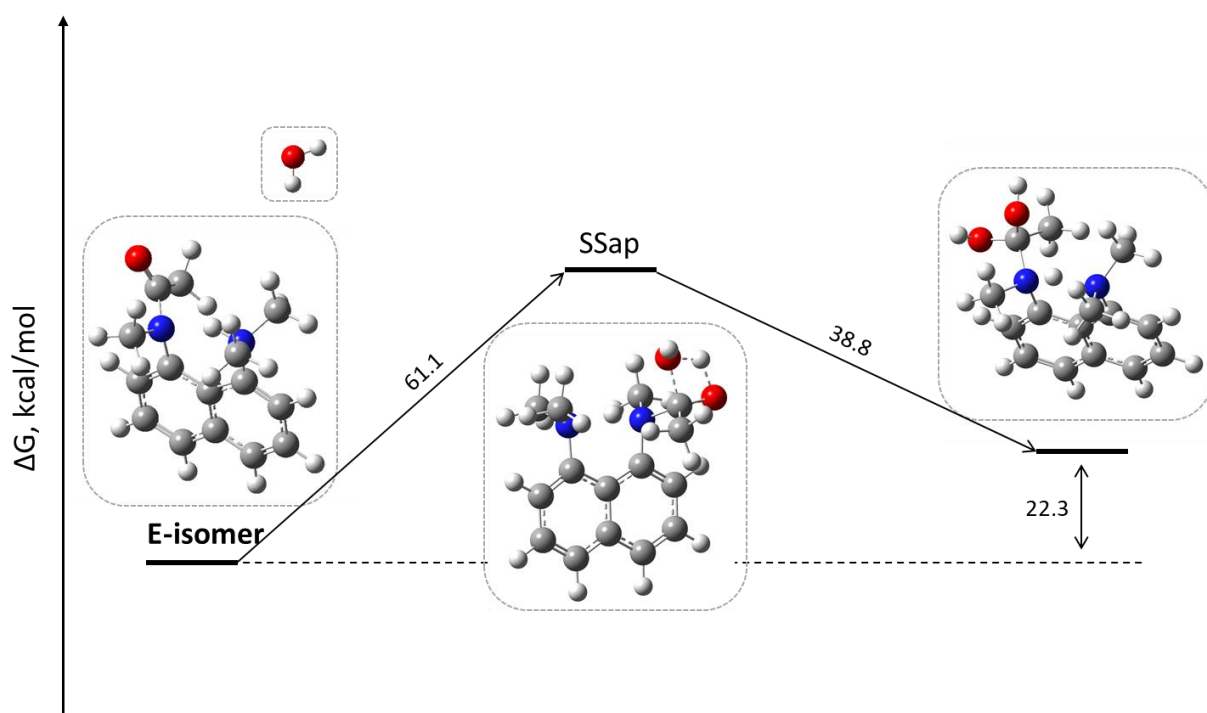

**Figure 13.** Energy profile for reaction of cation  $10H^+$  and  $H_2O$  molecule with concerted CO group protonation in acetonitrile (PCM) without assistance of an anion.

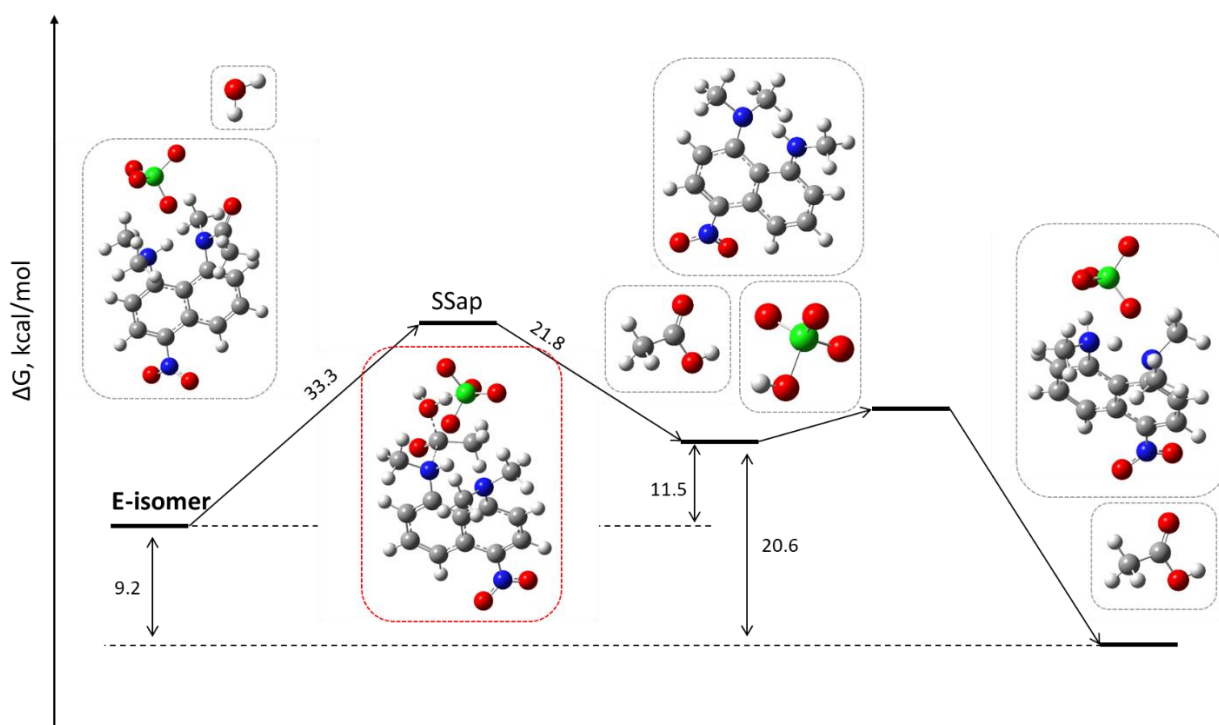

**Figure 14.** Energy profile for  $ClO_4^-$  assisted reaction of cation  $14H^+$  with  $H_2O$  molecule in acetonitrile (PCM).

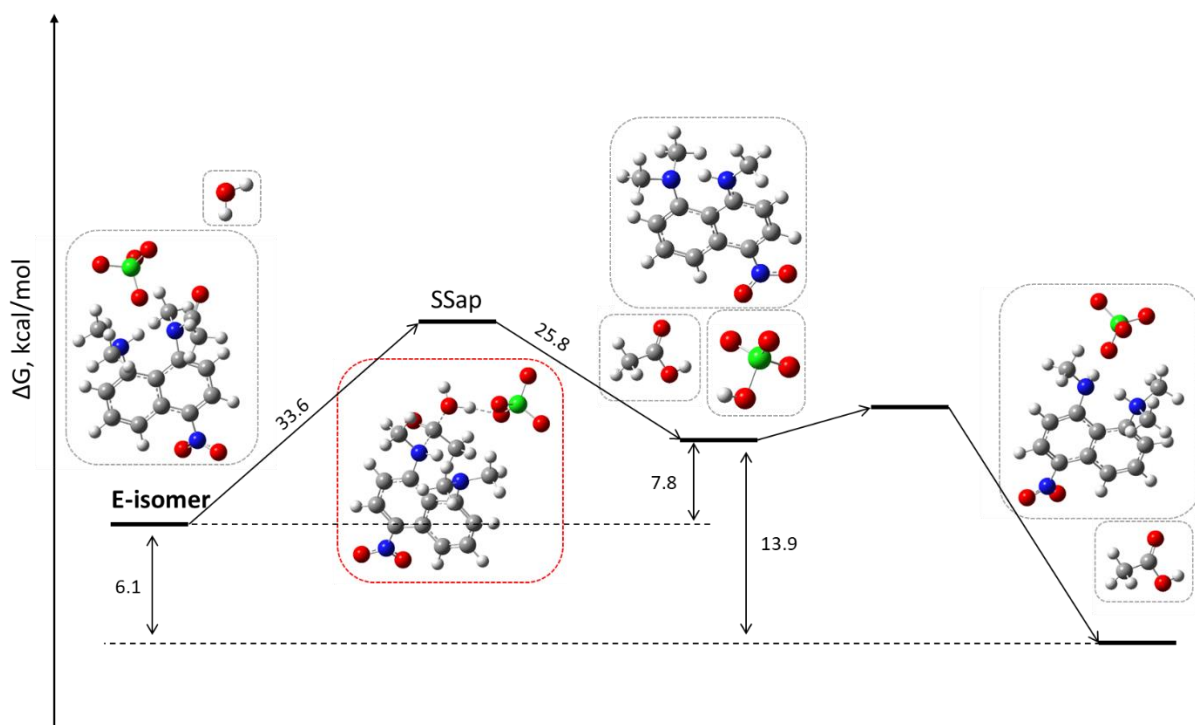

**Figure 15.** Energy profile for ClO<sub>4</sub><sup>-</sup> assisted reaction of cation 16H<sup>+</sup> with H<sub>2</sub>O molecule in acetonitrile (PCM).

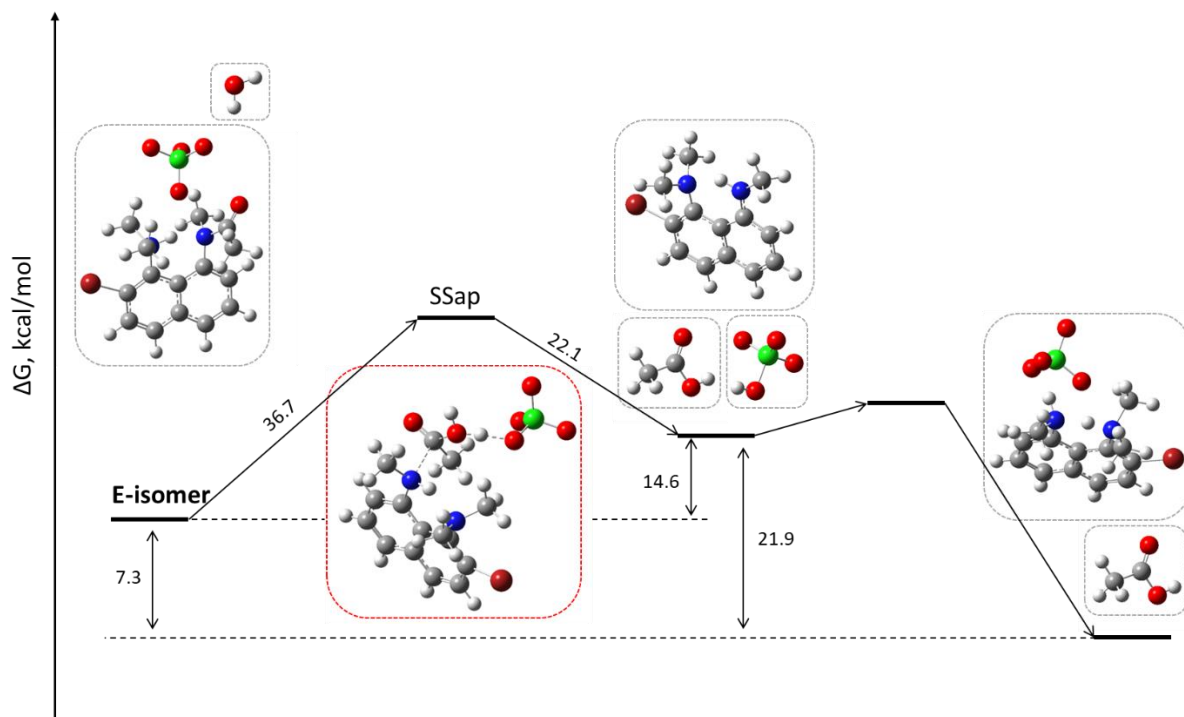

**Figure 16.** Energy profile for ClO<sub>4</sub><sup>-</sup> assisted reaction of cation 12H<sup>+</sup> with H<sub>2</sub>O molecule in acetonitrile (PCM).

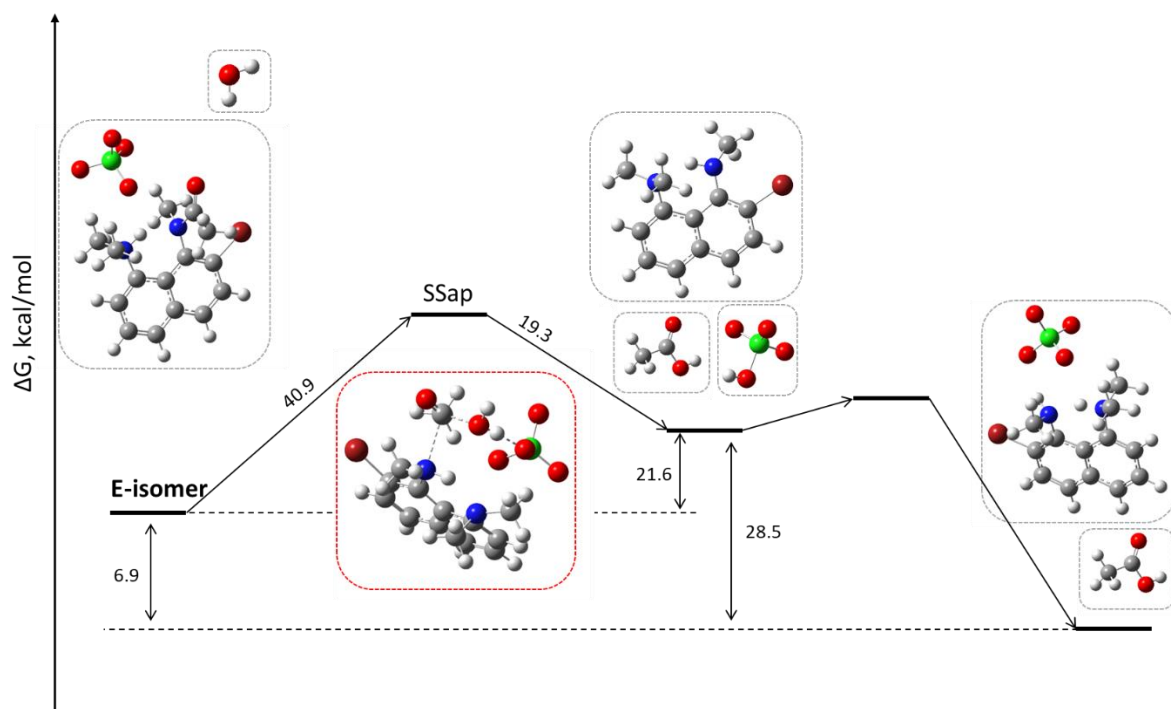

**Figure 17.** Energy profile for ClO<sub>4</sub><sup>-</sup> assisted reaction of cation 19H<sup>+</sup> with H<sub>2</sub>O molecule in acetonitrile (PCM).

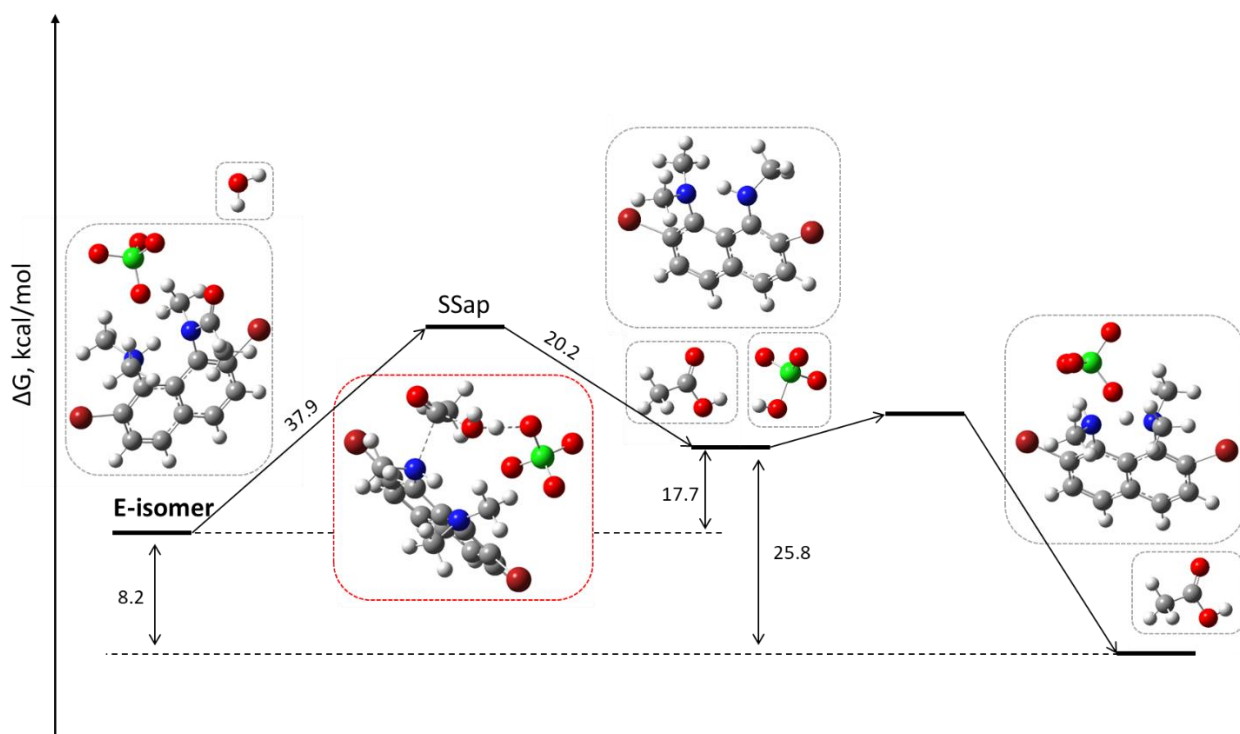

**Figure 18.** Energy profile for ClO<sub>4</sub><sup>-</sup> assisted reaction of cation 25H<sup>+</sup> with H<sub>2</sub>O molecule in acetonitrile (PCM).

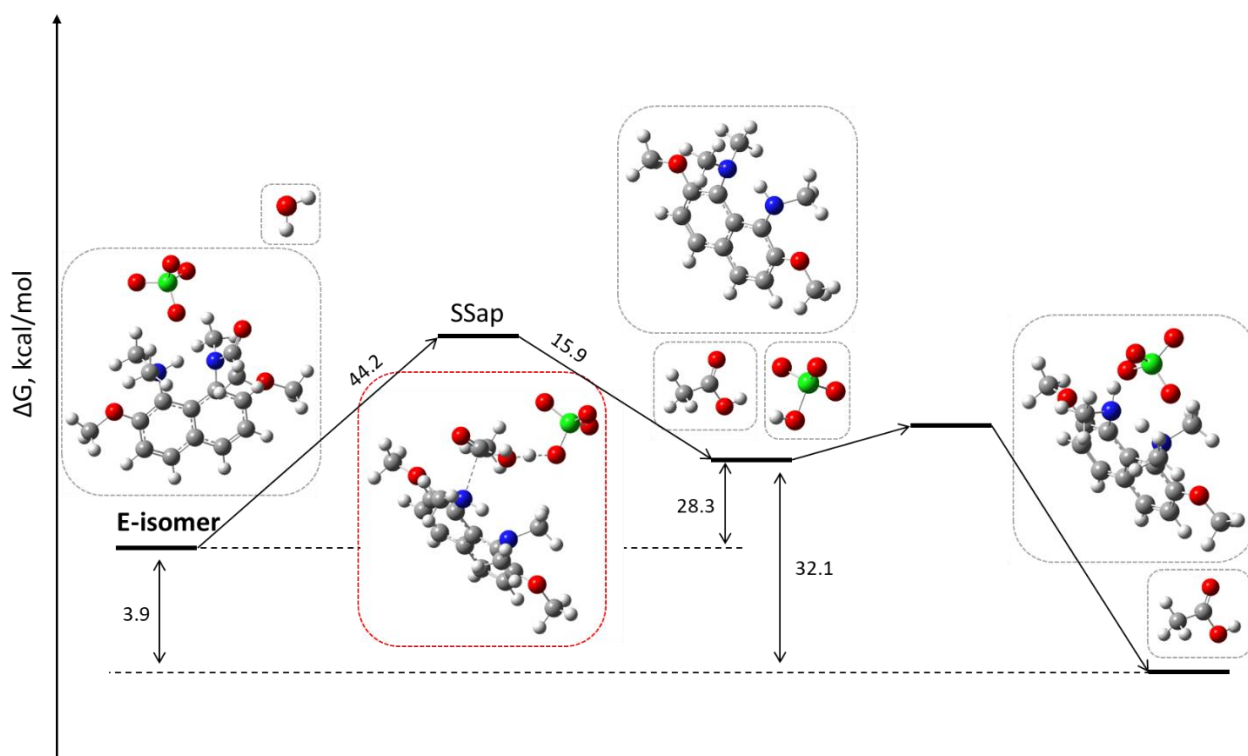

Figure 19. Energy profile for ClO<sub>4</sub><sup>-</sup> assisted reaction of cation 29H<sup>+</sup> with H<sub>2</sub>O molecule in acetonitrile (PCM).

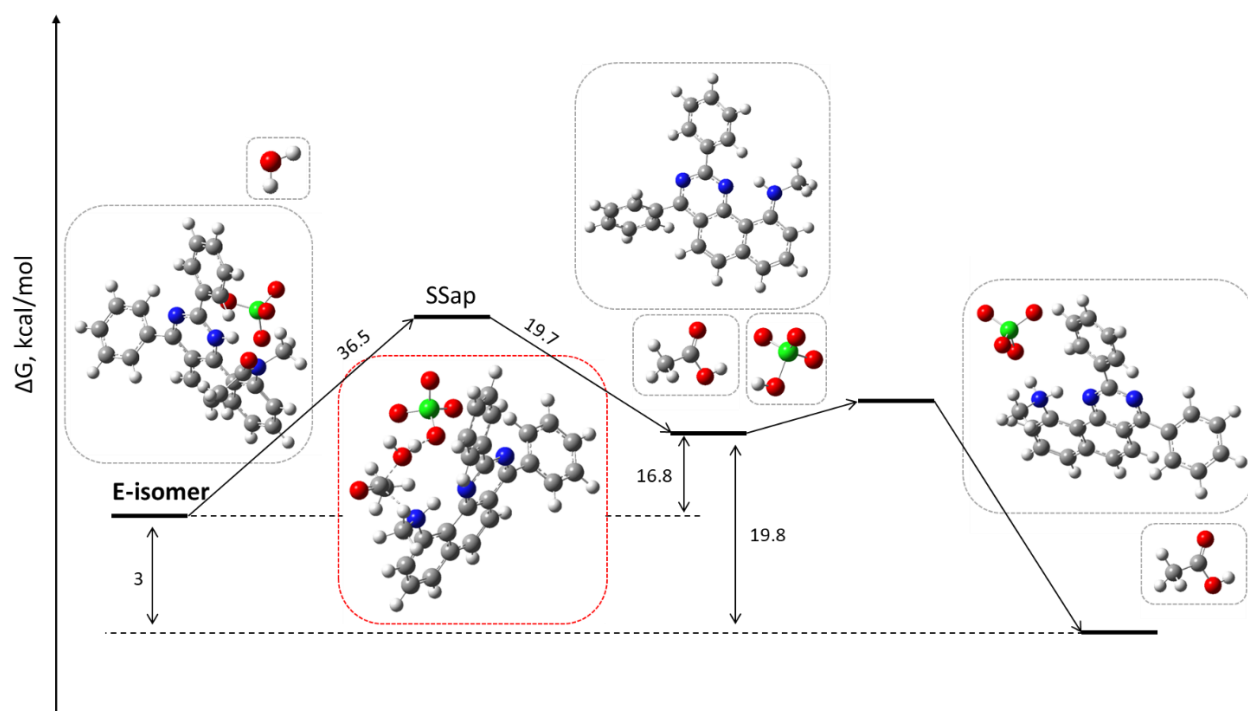

Figure 20. Energy profile for ClO<sub>4</sub><sup>-</sup> assisted reaction of cation 35H<sup>+</sup> with H<sub>2</sub>O molecule in acetonitrile (PCM).



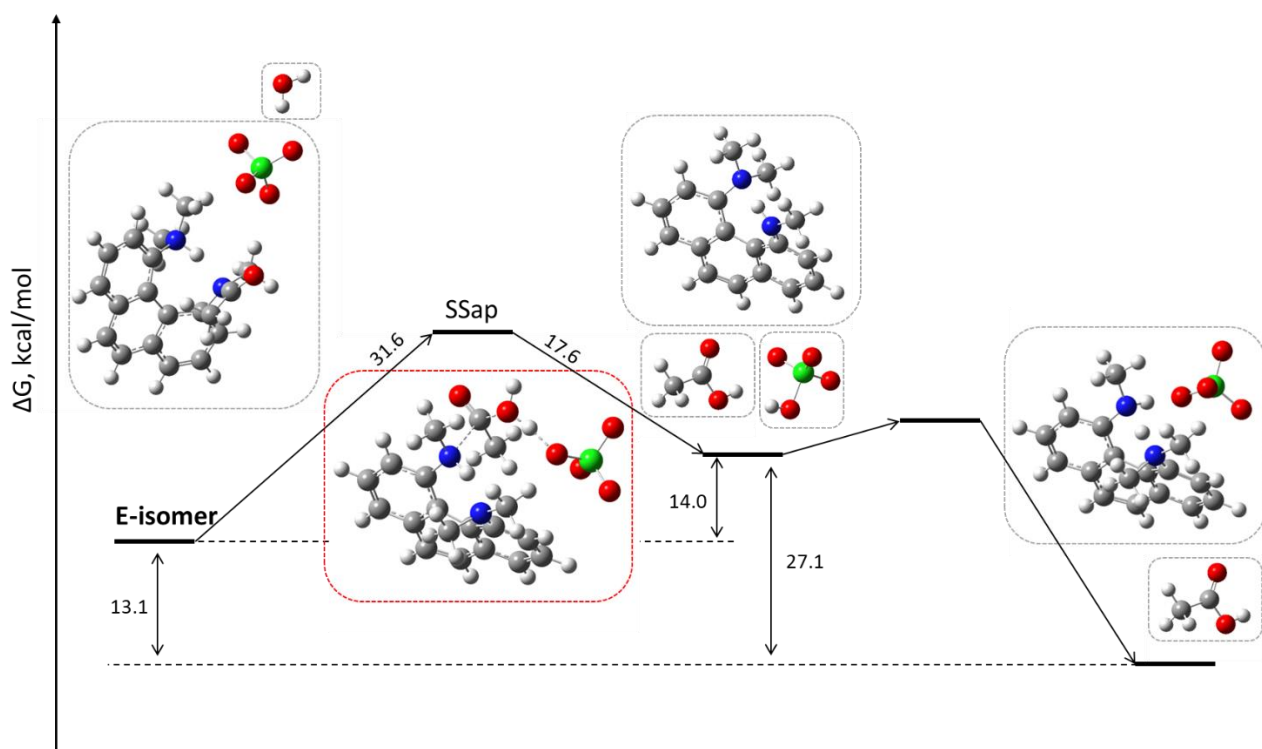

**Figure 21.** Energy profile for ClO<sub>4</sub><sup>-</sup> assisted reaction of cation 38H<sup>+</sup> with H<sub>2</sub>O molecule in acetonitrile (PCM).

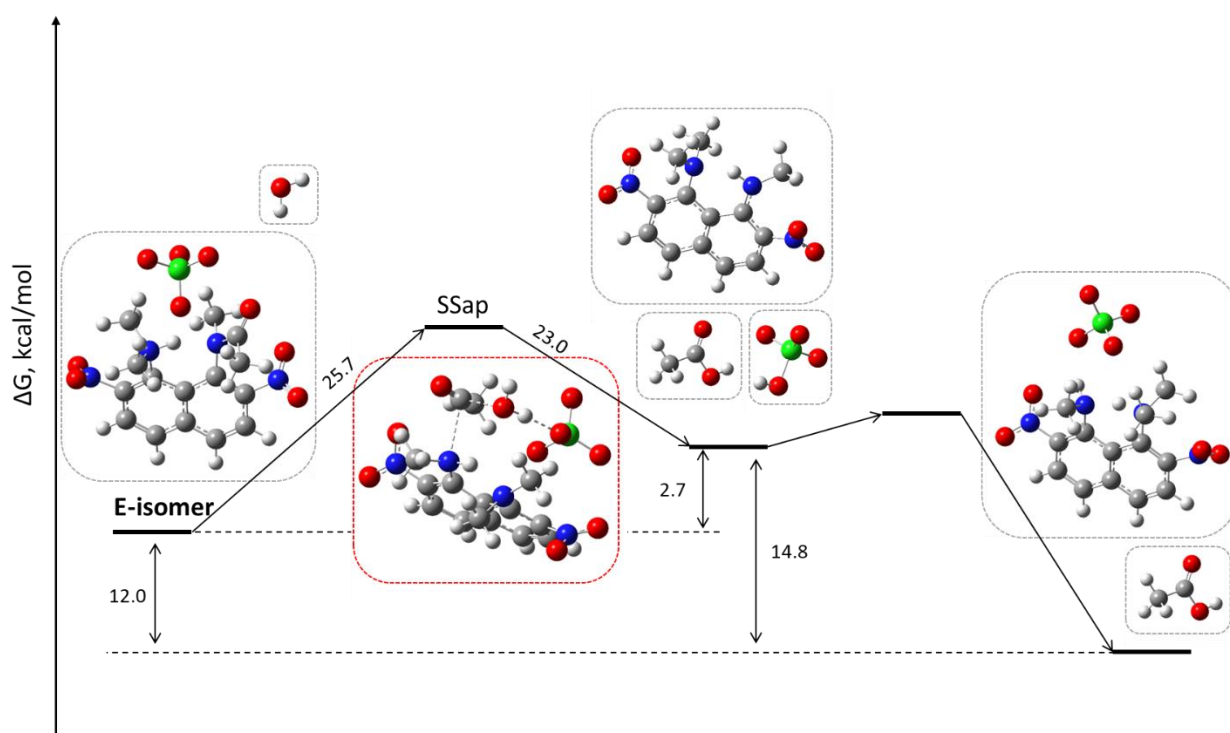

**Figure 22.** Energy profile for ClO<sub>4</sub><sup>-</sup> assisted reaction of cation 26H<sup>+</sup> with H<sub>2</sub>O molecule in acetonitrile (PCM).
